# Supplementary material
Source: publisher site journal article supplement (https://www.spandidos-publications.com/5796/downloadSupplementary)
Supplement: Supplementary file 1 [file downloadSupplementary]

## Sheet: Sheet1
Table SII. differentially expressed genes (DEGs)
Tag	logFC	AveExpr	t	P.Value	adj.P.Val	B
AGER	-2.10013	5.49846	-14.808	1.20604e-34	3.06646e-30	67.9312
ITLN2	-2.86997	6.03611	-14.562	7.36398e-34	6.34668e-30	66.1547
SH3GL3	-1.79331	4.69997	-14.5597	7.4915e-34	6.34668e-30	66.1379
CAV1	-2.26894	8.96941	-14.5206	9.98455e-34	6.34668e-30	65.8558
GDF10	-1.73721	4.74513	-14.3825	2.75773e-33	1.40236e-29	64.8581
WNT3A	-2.12694	5.07262	-13.693	4.38589e-31	1.8586e-27	59.8791
FMO2	-1.96504	8.20437	-13.5749	1.04388e-30	3.79168e-27	59.0272
CHMP4B	1.04644	9.62273	13.3692	4.72293e-30	1.50107e-26	57.5442
GHR	-1.91371	5.40407	-13.2312	1.29846e-29	3.6683e-26	56.5506
SDPR	-2.09761	8.24826	-13.1948	1.69541e-29	4.31076e-26	56.2885
SOSTDC1	-2.47709	5.97574	-13.0961	3.49132e-29	8.07003e-26	55.5787
CES1	-1.53511	5.97321	-13.04	5.26276e-29	1.11509e-25	55.1755
C3orf54	-1.44534	6.69227	-12.9881	7.69307e-29	1.50465e-25	54.8025
FAM107A	-2.68849	7.68116	-12.7956	3.14018e-28	5.70302e-25	53.4204
TCF21	-1.84664	5.75215	-12.7104	5.84803e-28	9.29325e-25	52.8094
LOC401286	-2.248	5.03796	-12.6992	6.34436e-28	9.48892e-25	52.7293
ADH1B	-2.53574	5.86719	-12.6393	9.82185e-28	1.38019e-24	52.2998
LIMS2	-1.31644	6.07159	-12.6326	1.03137e-27	1.38019e-24	52.2518
BCHE	-1.49854	5.22231	-12.5309	2.16352e-27	2.75048e-24	51.5238
MARCKSL1	1.37754	10.7815	12.4425	4.11485e-27	4.9821e-24	50.8921
LOC653463	-2.07558	5.55713	-12.2957	1.19569e-26	1.26673e-23	49.8439
RGC32	-1.66136	11.5525	-12.2888	1.25705e-26	1.27847e-23	49.7947
CLEC1A	-1.54951	6.41732	-12.274	1.39988e-26	1.36897e-23	49.6889
TGFBR3	-1.65819	8.31892	-12.1899	2.57591e-26	2.40082e-23	49.0897
FABP4	-2.41169	5.94938	-12.1863	2.64387e-26	2.40082e-23	49.0641
FHL1	-1.9873	7.16567	-11.9627	1.33291e-25	1.12968e-22	47.4744
LDB2	-1.56186	9.38527	-11.915	1.88192e-25	1.54354e-22	47.1355
CRYAB	-1.90182	7.72495	-11.9049	2.02335e-25	1.557e-22	47.0643
CDO1	-1.31573	5.1096	-11.901	2.08204e-25	1.557e-22	47.0362
EFCBP1	-1.13469	4.33691	-11.8736	2.5367e-25	1.80937e-22	46.8421
SPP1	2.48432	10.5819	11.8722	2.56185e-25	1.80937e-22	46.8324
C10orf67	-1.2299	4.43332	-11.838	3.27812e-25	2.22493e-22	46.5901
CAV2	-1.70921	7.63992	-11.8361	3.32523e-25	2.22493e-22	46.5761
ADAMTS8	-1.47293	5.2904	-11.8201	3.73086e-25	2.43233e-22	46.463
MFAP4	-2.24883	9.93845	-11.777	5.09095e-25	3.15713e-22	46.1576
ABCA8	-1.06199	5.18111	-11.7446	6.42616e-25	3.79773e-22	45.9287
CA4	-2.63429	6.75628	-11.7425	6.52277e-25	3.79773e-22	45.914
JAM2	-1.54119	6.90793	-11.6471	1.29602e-24	7.16362e-22	45.2394
DUOX1	-1.1415	5.36778	-11.629	1.47593e-24	7.98445e-22	45.1117
CLEC3B	-2.29892	7.05289	-11.5653	2.33189e-24	1.23522e-21	44.6622
TEK	-1.94674	7.48453	-11.4816	4.24953e-24	2.16097e-21	44.0726
PLA2G4F	-1.97454	6.13127	-11.4784	4.34584e-24	2.16662e-21	44.0505
ANXA8	-2.62607	6.42061	-11.46	4.96051e-24	2.4255e-21	43.9205
MGC34774	-1.64888	4.88363	-11.4483	5.39431e-24	2.58784e-21	43.8382
NAP5	-1.06611	4.73654	-11.4401	5.71657e-24	2.69166e-21	43.7812
MCEMP1	-2.79378	7.91044	-11.434	5.97415e-24	2.7618e-21	43.7379
ANGPT1	-1.59563	6.74091	-11.4301	6.14285e-24	2.78907e-21	43.7105
TMEM100	-2.27165	6.38815	-11.4251	6.36555e-24	2.83948e-21	43.6755
MMRN1	-1.93321	6.35604	-11.3777	8.93706e-24	3.91782e-21	43.3421
CD36	-1.49419	6.03279	-11.3384	1.18333e-23	5.09957e-21	43.0663
TIMP1	1.08241	13.6973	11.3027	1.52709e-23	6.47128e-21	42.8157
MMP11	2.34781	8.88203	11.2998	1.5585e-23	6.49615e-21	42.7957
STXBP6	-1.69194	5.97209	-11.2387	2.40985e-23	9.72586e-21	42.3675
FLJ21986	-1.45878	7.58226	-11.1867	3.49215e-23	1.38736e-20	42.0031
C20orf160	-1.37766	6.58866	-11.182	3.61109e-23	1.41255e-20	41.9702
HSPA12B	-1.3944	6.65927	-11.178	3.71335e-23	1.43054e-20	41.9427
CPB2	-1.64538	4.73301	-11.1685	3.97427e-23	1.48603e-20	41.876
PEBP4	-2.38192	6.12154	-11.1565	4.32719e-23	1.58138e-20	41.7924
SPOCK2	-1.78191	9.77604	-11.1557	4.35369e-23	1.58138e-20	41.7864
CLDN5	-1.68277	9.29161	-11.1417	4.80728e-23	1.67692e-20	41.6891
GPM6B	-1.17611	5.35106	-11.1251	5.41265e-23	1.85976e-20	41.5725
ADRB2	-1.63831	7.57341	-11.1009	6.4252e-23	2.17823e-20	41.4041
LGI3	-1.11358	4.27365	-11.0897	6.96119e-23	2.32888e-20	41.3253
ADH1A	-2.98374	8.40618	-11.0807	7.41659e-23	2.44902e-20	41.2631
LOC285016	-2.01204	6.32166	-11.0355	1.02252e-22	3.31035e-20	40.9476
AGTR1	-1.05908	4.71926	-11.0347	1.02854e-22	3.31035e-20	40.9418
SNCA	-1.68973	5.94912	-11.005	1.26972e-22	4.0355e-20	40.7349
SVEP1	-1.91041	8.24172	-10.9665	1.66833e-22	5.2369e-20	40.4667
C13orf1	-1.07481	6.41357	-10.9484	1.89595e-22	5.85491e-20	40.341
THBS2	1.7299	10.3482	10.9473	1.91126e-22	5.85491e-20	40.3331
EDG1	-1.43293	6.33172	-10.9419	1.98496e-22	6.00829e-20	40.2959
RECK	-1.13747	5.83308	-10.9357	2.07403e-22	6.20404e-20	40.2528
ST14	1.24706	8.82202	10.9332	2.11158e-22	6.24292e-20	40.2352
DNASE1L3	-2.0591	5.98951	-10.92	2.31799e-22	6.7744e-20	40.1436
PTPRB	-1.45996	6.5777	-10.9168	2.37051e-22	6.84916e-20	40.1216
LTBP4	-1.03171	6.41619	-10.9087	2.51098e-22	7.01373e-20	40.065
TSPAN7	-2.2557	7.4012	-10.908	2.52307e-22	7.01373e-20	40.0603
SPARCL1	-1.84575	10.5483	-10.9072	2.53781e-22	7.01373e-20	40.0546
PCOLCE2	-2.23858	6.82152	-10.9048	2.58044e-22	7.05486e-20	40.0382
ACADL	-1.5264	5.05103	-10.8691	3.32236e-22	8.89205e-20	39.79
TSCOT	-1.17631	6.63038	-10.861	3.51886e-22	9.31986e-20	39.7335
CES4	-1.02409	4.61474	-10.8477	3.86561e-22	1.01327e-19	39.6412
ITM2A	-1.04677	6.94421	-10.8436	3.97815e-22	1.03213e-19	39.613
FOXF1	-1.3594	5.73817	-10.8038	5.26691e-22	1.35269e-19	39.3374
LOC131873	-1.87921	5.73033	-10.7903	5.7926e-22	1.47283e-19	39.2439
C1orf21	-1.42918	6.2934	-10.7862	5.963e-22	1.50114e-19	39.2154
C10orf116	-2.0535	10.813	-10.779	6.27694e-22	1.56468e-19	39.165
CYYR1	-1.48512	7.48064	-10.769	6.73528e-22	1.66263e-19	39.0958
TMEM45B	2.126	7.51966	10.7671	6.82339e-22	1.66819e-19	39.083
STX11	-1.68202	7.52939	-10.7629	7.0291e-22	1.70211e-19	39.0539
CDH5	-1.60139	8.59439	-10.6898	1.1761e-21	2.76886e-19	38.5483
ANKRD47	-1.11471	5.5677	-10.6632	1.41819e-21	3.30817e-19	38.3644
PDK4	-2.12324	7.22223	-10.6592	1.45778e-21	3.33923e-19	38.3374
PLAC9	-1.8987	7.58544	-10.6532	1.52057e-21	3.45196e-19	38.296
CAMP	-1.96206	5.63645	-10.6285	1.80922e-21	4.07091e-19	38.1252
MAMDC2	-2.496	7.20841	-10.6252	1.8517e-21	4.12993e-19	38.1025
CGNL1	-1.40033	9.58868	-10.6134	2.01199e-21	4.44841e-19	38.0209
SLC6A4	-1.35039	4.4222	-10.5831	2.48869e-21	5.40833e-19	37.8121
RHOJ	-1.26577	6.04677	-10.5731	2.66883e-21	5.75065e-19	37.7434
INMT	-2.47429	8.279	-10.5713	2.70277e-21	5.77483e-19	37.731
BTNL9	-1.18626	4.70664	-10.5689	2.74943e-21	5.82559e-19	37.7142
EPAS1	-1.38384	11.1466	-10.56	2.92452e-21	6.09499e-19	37.6536
TNNC1	-2.09193	6.58206	-10.5495	3.14931e-21	6.51011e-19	37.5809
GPX3	-1.56756	10.9377	-10.5369	3.43961e-21	7.05287e-19	37.4943
XLKD1	-1.647	5.51459	-10.5325	3.54827e-21	7.21746e-19	37.4637
LAMP3	-1.86611	8.53415	-10.5263	3.70316e-21	7.47275e-19	37.4217
SRPX	-2.09454	7.35595	-10.5251	3.73591e-21	7.47947e-19	37.4131
TFRC	-1.2231	11.3671	-10.4916	4.72137e-21	9.37856e-19	37.1832
GRRP1	-1.11297	5.81242	-10.485	4.9457e-21	9.74801e-19	37.1376
CHST7	-1.14014	8.15841	-10.4543	6.13166e-21	1.1901e-18	36.9265
S100A3	-1.77539	6.55312	-10.4509	6.27637e-21	1.20298e-18	36.9036
VWF	-1.28858	12.0447	-10.4498	6.324e-21	1.20298e-18	36.8962
GPT2	1.64267	9.28025	10.4366	6.93802e-21	1.2971e-18	36.8052
CDC20	1.80814	9.53374	10.4322	7.15346e-21	1.32762e-18	36.7751
AQP4	-2.01004	5.97969	-10.4208	7.74539e-21	1.42706e-18	36.6971
GOLPH2	1.08963	6.23646	10.4184	7.87773e-21	1.441e-18	36.6804
KAL1	-1.95945	7.15932	-10.4057	8.60612e-21	1.56299e-18	36.5936
PKNOX2	-1.03367	5.06308	-10.4032	8.76009e-21	1.57717e-18	36.5762
AHNAK	-1.06029	7.51132	-10.4024	8.80825e-21	1.57717e-18	36.5708
FHL5	-1.16121	4.90988	-10.3914	9.51038e-21	1.69099e-18	36.4955
HIGD1B	-1.84029	6.81605	-10.3864	9.84886e-21	1.73901e-18	36.4611
ABI3BP	-1.83516	7.45446	-10.3852	9.92733e-21	1.74077e-18	36.4533
CACNA2D2	-1.41518	6.01515	-10.3739	1.07406e-20	1.86497e-18	36.376
ANKRD29	-1.63981	6.11462	-10.3734	1.07823e-20	1.86497e-18	36.3722
GSTM5	-1.10435	4.91582	-10.3665	1.13126e-20	1.94347e-18	36.3251
HEG1	-1.0332	7.48326	-10.3489	1.27871e-20	2.18204e-18	36.2048
VGLL3	-1.39335	5.40863	-10.3334	1.42479e-20	2.40094e-18	36.0985
COX7A1	-1.33938	8.53164	-10.3044	1.74235e-20	2.87669e-18	35.901
LRRN3	-1.23434	4.99817	-10.3009	1.78617e-20	2.93001e-18	35.8766
SOX17	-1.20637	4.99352	-10.2819	2.03834e-20	3.32224e-18	35.7469
PPP1R14A	-1.3674	8.86352	-10.261	2.35722e-20	3.79333e-18	35.6042
PECAM1	-1.48796	9.12759	-10.2488	2.5643e-20	4.07499e-18	35.5215
IL17D	-1.00613	6.13779	-10.2358	2.80767e-20	4.43403e-18	35.4325
GSTA4	-1.39304	8.19186	-10.2055	3.46337e-20	5.40244e-18	35.2264
CFD	-1.77754	10.0474	-10.1934	3.76653e-20	5.8041e-18	35.144
CRTAC1	-2.56703	7.41624	-10.1847	4.00055e-20	6.12759e-18	35.0848
SEMA6A	-1.78127	7.5272	-10.1521	5.0153e-20	7.63587e-18	34.8629
CAT	-1.10567	8.2271	-10.127	5.96425e-20	9.02661e-18	34.6927
HSPB2	-1.09841	6.10738	-10.1069	6.85536e-20	1.02121e-17	34.556
ACVRL1	-1.27793	6.86676	-10.1058	6.90526e-20	1.02121e-17	34.5489
KLF4	-1.11872	5.88149	-10.1006	7.16241e-20	1.05267e-17	34.513
DBNDD1	1.29	7.70163	10.0849	7.98217e-20	1.16641e-17	34.4066
SLC16A3	1.11123	11.0191	10.0817	8.16129e-20	1.18577e-17	34.3848
GPC3	-2.07996	6.8949	-10.0541	9.87086e-20	1.41795e-17	34.1981
OLFML1	-1.39444	6.89778	-10.0508	1.00998e-19	1.44144e-17	34.1756
SLC19A3	-1.53201	5.54453	-10.0493	1.02022e-19	1.44144e-17	34.1657
C2orf32	-1.16784	5.78778	-10.0493	1.02045e-19	1.44144e-17	34.1655
PGM5	-1.19431	5.75955	-10.046	1.04378e-19	1.46625e-17	34.1433
KIAA1912	-1.45968	5.49576	-10.0229	1.22384e-19	1.70974e-17	33.9871
CLEC14A	-1.53358	9.02544	-10.0181	1.26506e-19	1.75767e-17	33.9546
HBEGF	-1.58121	8.66341	-10.0161	1.28273e-19	1.77254e-17	33.9409
KIAA1324L	-1.4815	7.23328	-10.0041	1.39294e-19	1.90367e-17	33.86
HOXA5	-1.24469	9.06221	-10.002	1.41375e-19	1.90367e-17	33.8455
SOCS2	-1.57807	8.13799	-10.0018	1.41506e-19	1.90367e-17	33.8446
PTGER4	-1.48249	7.89505	-9.99894	1.44366e-19	1.93193e-17	33.8249
C9orf19	-1.21397	10.845	-9.99339	1.49994e-19	1.99673e-17	33.7874
LPL	-1.99759	7.24144	-9.988	1.55667e-19	2.06146e-17	33.7509
SASH1	-1.06522	8.06562	-9.98126	1.63057e-19	2.14813e-17	33.7054
MS4A2	-1.59984	5.75297	-9.96413	1.83453e-19	2.40437e-17	33.5897
EMCN	-1.29191	5.49768	-9.96164	1.86626e-19	2.43341e-17	33.5729
TMEM88	-1.25702	5.72478	-9.95871	1.90414e-19	2.47014e-17	33.5532
RASL12	-1.32278	7.77223	-9.94141	2.14466e-19	2.76803e-17	33.4364
TACC1	-1.03774	11.3736	-9.92906	2.33452e-19	2.99786e-17	33.3531
SERINC2	1.8055	8.26733	9.92765	2.35734e-19	3.01194e-17	33.3436
CALCRL	-1.60832	7.02336	-9.92484	2.40332e-19	3.05534e-17	33.3246
C1orf186	-1.5321	5.43698	-9.91804	2.51819e-19	3.18544e-17	33.2788
FIGF	-1.12895	4.79968	-9.90544	2.74574e-19	3.4561e-17	33.1939
FUT3	1.83507	7.0417	9.89387	2.97263e-19	3.72326e-17	33.1159
HSPB8	-1.64735	6.60582	-9.89294	2.99149e-19	3.72851e-17	33.1097
PAFAH1B3	1.20731	10.0946	9.89168	3.01765e-19	3.74277e-17	33.1012
LOC653110	-1.01396	4.89195	-9.885	3.15906e-19	3.89914e-17	33.0562
NIP	-1.87081	6.18651	-9.87817	3.31052e-19	4.04748e-17	33.0103
C14orf132	-1.45591	7.55052	-9.87815	3.31109e-19	4.04748e-17	33.0101
HOXA4	-1.24601	5.20315	-9.86997	3.50209e-19	4.26049e-17	32.9551
PPM1F	-1.00018	9.68582	-9.8637	3.65586e-19	4.42638e-17	32.9129
COL13A1	-1.04404	5.80261	-9.85269	3.9421e-19	4.75033e-17	32.8389
LOC648470	-1.19149	7.80358	-9.84885	4.04739e-19	4.8542e-17	32.813
CRABP2	2.50431	9.24107	9.83173	4.55066e-19	5.40678e-17	32.698
COMP	2.45415	8.0531	9.79657	5.7883e-19	6.78218e-17	32.4619
TCEAL2	-1.90259	5.858	-9.79551	5.83013e-19	6.79985e-17	32.4548
CHPF	1.20217	8.80401	9.7823	6.38113e-19	7.37484e-17	32.3662
MFNG	-1.20364	8.16934	-9.77685	6.62325e-19	7.62003e-17	32.3296
GDDR	-3.1015	7.04634	-9.75939	7.46213e-19	8.50816e-17	32.2126
HBA2	-2.3969	10.9155	-9.75361	7.76231e-19	8.81091e-17	32.1739
C1orf162	-1.31728	10.13	-9.74436	8.26824e-19	9.30214e-17	32.1119
ADAM8	1.40082	7.36153	9.74035	8.49764e-19	9.5181e-17	32.0851
KLF9	-1.23359	10.2772	-9.73658	8.71859e-19	9.72276e-17	32.0599
SCN4B	-1.00221	4.98498	-9.73058	9.08328e-19	1.00438e-16	32.0197
C1QR1	-1.64256	10.078	-9.73054	9.08544e-19	1.00438e-16	32.0194
HBA1	-2.21411	11.8984	-9.68913	1.20478e-18	1.32037e-16	31.7425
SOX7	-1.33159	5.49052	-9.67712	1.30738e-18	1.42058e-16	31.6623
CLDN18	-1.93482	6.7179	-9.67614	1.31615e-18	1.42401e-16	31.6558
SLC31A2	-1.3459	8.70164	-9.66487	1.42105e-18	1.52454e-16	31.5805
GCNT3	2.92781	8.22365	9.66211	1.44802e-18	1.54695e-16	31.562
KCNK5	1.57807	6.07877	9.65997	1.46923e-18	1.56304e-16	31.5478
KSP37	-1.90768	4.94993	-9.65638	1.5055e-18	1.59495e-16	31.5239
CDH13	-1.41408	5.29191	-9.64456	1.63149e-18	1.72125e-16	31.445
MS4A7	-1.49151	8.5778	-9.64068	1.6751e-18	1.75997e-16	31.4191
COL1A1	1.80772	11.7655	9.6296	1.80609e-18	1.88978e-16	31.3452
OCIAD2	1.09314	10.1921	9.61978	1.93064e-18	2.00361e-16	31.2798
C6orf189	-1.58998	8.30308	-9.60441	2.14294e-18	2.20592e-16	31.1774
PROM2	2.00694	8.89673	9.58605	2.42727e-18	2.47709e-16	31.0552
MARCO	-2.35887	7.957	-9.58554	2.43559e-18	2.47709e-16	31.0518
PRC1	1.23768	8.72262	9.5758	2.60192e-18	2.63571e-16	30.987
MGC14376	-1.15998	7.86776	-9.56896	2.72549e-18	2.74779e-16	30.9415
TOP2A	1.84984	9.33284	9.56849	2.73417e-18	2.74779e-16	30.9384
SMAD6	-1.52821	7.518	-9.55246	3.04772e-18	3.05084e-16	30.8318
LOC149620	-1.82357	5.23195	-9.53864	3.34671e-18	3.29819e-16	30.74
DPEP2	-1.64091	6.81464	-9.53008	3.54625e-18	3.45467e-16	30.6832
FXYD6	-1.35273	7.53496	-9.52549	3.65821e-18	3.55014e-16	30.6527
LAYN	-1.28308	6.76099	-9.52369	3.70309e-18	3.58003e-16	30.6407
SLC2A1	1.90598	9.92757	9.52152	3.75772e-18	3.60645e-16	30.6264
FLJ22184	1.69232	6.68032	9.52148	3.75879e-18	3.60645e-16	30.6261
TTYH3	1.0565	8.9696	9.51918	3.81761e-18	3.64912e-16	30.6109
THBD	-1.25632	5.31215	-9.51394	3.95539e-18	3.75051e-16	30.5761
FABP5	-1.31384	6.36564	-9.51347	3.96794e-18	3.75051e-16	30.573
HSPB6	-1.52228	6.03714	-9.50737	4.13514e-18	3.8797e-16	30.5325
TIE1	-1.03975	5.75555	-9.50595	4.17513e-18	3.90282e-16	30.523
CCL14	-1.98794	7.91737	-9.50172	4.29612e-18	4.00121e-16	30.495
HBB	-2.61615	11.3693	-9.48491	4.8127e-18	4.43361e-16	30.3836
CEACAM1	1.25135	7.7864	9.48289	4.87886e-18	4.46533e-16	30.3702
RAMP3	-1.40437	7.03379	-9.48279	4.88225e-18	4.46533e-16	30.3695
SLIT2	-1.34423	8.62305	-9.46832	5.3834e-18	4.90603e-16	30.2737
F10	-1.30927	5.00523	-9.46493	5.50791e-18	5.00157e-16	30.2513
FCN3	-2.04901	7.50301	-9.42999	6.97139e-18	6.26341e-16	30.0201
CCL23	-1.14927	6.2134	-9.42608	7.15738e-18	6.40787e-16	29.9943
SMPDL3B	1.47898	6.70635	9.41104	7.9206e-18	7.04158e-16	29.8949
C13orf21	-1.18497	5.79444	-9.40676	8.15193e-18	7.22199e-16	29.8666
LOC652846	-2.3078	5.12908	-9.3932	8.93096e-18	7.80339e-16	29.7771
NTNG1	-1.09288	4.55285	-9.37365	1.01864e-17	8.80952e-16	29.6481
VSIG4	-1.62183	7.68478	-9.37108	1.03638e-17	8.93253e-16	29.6312
ECRG4	-2.29953	5.68768	-9.37029	1.04187e-17	8.94953e-16	29.626
TUBB3	1.89528	8.81983	9.36021	1.11491e-17	9.54467e-16	29.5595
ABCC3	1.13396	7.56918	9.35452	1.15838e-17	9.85045e-16	29.522
PLSCR4	-1.05502	7.93436	-9.34906	1.20165e-17	1.01844e-15	29.486
CD300C	-1.13809	5.12505	-9.33728	1.30057e-17	1.09497e-15	29.4084
RASIP1	-1.30818	7.98627	-9.33252	1.34271e-17	1.12672e-15	29.3772
NPNT	-1.44811	5.97354	-9.31058	1.5556e-17	1.29681e-15	29.2328
PTHR1	-1.31814	6.74234	-9.3043	1.62259e-17	1.34823e-15	29.1915
C20orf100	-1.1946	9.41898	-9.30065	1.66272e-17	1.37708e-15	29.1675
FLJ20701	-1.54027	6.39647	-9.29999	1.67013e-17	1.37872e-15	29.1632
SEPP1	-1.22868	6.56552	-9.29911	1.67992e-17	1.38232e-15	29.1574
FGD5	-1.31859	7.69559	-9.28809	1.80866e-17	1.47394e-15	29.085
VIPR1	-1.54423	8.34376	-9.2748	1.97702e-17	1.60088e-15	28.9977
KIAA0672	-1.60311	7.72351	-9.26567	2.10157e-17	1.69633e-15	28.9378
CLIC5	-1.9937	7.37796	-9.26236	2.14868e-17	1.72887e-15	28.9161
WASF3	-1.34384	6.28602	-9.25048	2.32639e-17	1.86008e-15	28.8381
C9orf61	-1.81543	6.81005	-9.23408	2.59603e-17	2.06271e-15	28.7306
STX1A	1.38219	7.12943	9.22519	2.75488e-17	2.17533e-15	28.6723
CDGAP	-1.1478	5.30513	-9.22314	2.79275e-17	2.1984e-15	28.6589
PLEK2	1.48521	7.04473	9.22099	2.83317e-17	2.22334e-15	28.6448
MYOM2	-1.37531	6.12109	-9.17325	3.89577e-17	3.01994e-15	28.3325
CBX7	-1.03619	7.82484	-9.17222	3.92268e-17	3.03156e-15	28.3258
FAM83A	1.88019	6.00808	9.15334	4.44819e-17	3.39861e-15	28.2025
TNFRSF21	1.0758	11.3176	9.14795	4.61078e-17	3.50999e-15	28.1673
CASQ2	-1.2572	4.78659	-9.14401	4.73344e-17	3.58192e-15	28.1416
HYOU1	1.06291	8.36735	9.14236	4.78558e-17	3.61063e-15	28.1308
CDH1	1.18388	11.3046	9.13886	4.89829e-17	3.67386e-15	28.108
TMEM62	1.01966	9.25765	9.13073	5.17051e-17	3.85529e-15	28.055
WFDC3	1.43798	6.01222	9.12637	5.32276e-17	3.94567e-15	28.0265
ADAMTS1	-1.54478	7.18799	-9.12445	5.39107e-17	3.98469e-15	28.014
SOX4	1.10959	8.87166	9.12273	5.45311e-17	4.01886e-15	28.0028
SGPP2	1.09135	6.5492	9.12166	5.49209e-17	4.03589e-15	27.9958
KRT8	1.36604	10.5873	9.11967	5.56522e-17	4.07785e-15	27.9828
LMCD1	-1.09833	9.07002	-9.10485	6.14135e-17	4.44411e-15	27.8862
CXXC5	1.00691	10.0086	9.1029	6.22121e-17	4.46837e-15	27.8736
ETV4	1.81734	6.50439	9.10078	6.30962e-17	4.51911e-15	27.8597
LMO2	-1.22108	7.46056	-9.09508	6.55288e-17	4.68016e-15	27.8227
CD52	-1.63675	10.5054	-9.09102	6.73193e-17	4.76786e-15	27.7962
FCER1A	-2.02527	7.1807	-9.08331	7.08573e-17	5.00449e-15	27.746
C20orf46	-1.34747	7.192	-9.06542	7.97829e-17	5.57297e-15	27.6297
CYP4B1	-2.31579	7.16173	-9.05899	8.3259e-17	5.784e-15	27.5879
TUBB6	-1.23071	7.32315	-9.05533	8.53073e-17	5.89408e-15	27.564
MMP9	1.82522	9.70627	9.04991	8.84239e-17	6.09286e-15	27.5289
HEY1	-1.25321	6.85949	-9.03479	9.77377e-17	6.68032e-15	27.4307
CTNNAL1	-1.16215	7.9667	-9.03197	9.95795e-17	6.78656e-15	27.4124
ARHGEF16	1.28891	6.39956	9.0316	9.9826e-17	6.78656e-15	27.41
FBLN5	-1.31175	7.44225	-9.02911	1.01484e-16	6.86273e-15	27.3938
KL	-1.10149	5.28552	-9.02911	1.01486e-16	6.86273e-15	27.3938
PRG4	-2.23016	6.53423	-9.02483	1.04404e-16	7.04131e-15	27.366
BTK	-1.39994	6.76665	-9.01752	1.09577e-16	7.35119e-15	27.3186
FAM43A	-1.1983	8.36556	-9.01693	1.10007e-16	7.3606e-15	27.3148
SFXN1	1.0827	6.93475	9.00949	1.15556e-16	7.65135e-15	27.2665
GFOD1	-1.18395	7.73652	-9.00902	1.15913e-16	7.65508e-15	27.2635
HOOK1	1.22176	9.00615	9	1.23041e-16	8.0844e-15	27.205
PHLDB2	-1.25571	5.3979	-8.99844	1.24314e-16	8.14641e-15	27.1949
DARC	-2.08414	7.75649	-8.98861	1.32658e-16	8.62647e-15	27.1312
MT1M	-2.22585	6.62104	-8.98695	1.34117e-16	8.69911e-15	27.1205
RAG1AP1	1.05315	8.14893	8.97995	1.40467e-16	9.06478e-15	27.0752
CENTB2	-1.01079	6.77533	-8.97278	1.4728e-16	9.45639e-15	27.0287
SPDEF	2.22396	6.70721	8.96299	1.57115e-16	1.00372e-14	26.9654
CCND2	-1.18298	9.64501	-8.96247	1.57646e-16	1.00459e-14	26.9621
LOC653626	-1.44914	5.89022	-8.96131	1.58858e-16	1.00978e-14	26.9545
ARHGEF6	-1.10523	9.66436	-8.95643	1.6406e-16	1.03948e-14	26.923
ECM2	-1.11098	6.20522	-8.95179	1.69163e-16	1.06728e-14	26.8929
CPA3	-2.23175	7.64486	-8.95088	1.70182e-16	1.07105e-14	26.8871
PPAP2B	-1.03741	7.21636	-8.94079	1.81886e-16	1.13907e-14	26.8219
KIAA1754	-1.0977	8.82644	-8.93201	1.92721e-16	1.20101e-14	26.7651
FUT2	1.9316	6.26506	8.92867	1.97005e-16	1.2247e-14	26.7436
C10orf54	-1.24753	7.39983	-8.92779	1.98153e-16	1.22884e-14	26.7379
GIMAP5	-1.48972	8.41248	-8.92662	1.99692e-16	1.23237e-14	26.7303
GSDML	1.04841	7.39343	8.91154	2.20535e-16	1.35442e-14	26.633
EFEMP1	-1.07733	7.02216	-8.90757	2.2637e-16	1.38358e-14	26.6074
SYNC1	-1.03197	5.28264	-8.90417	2.31492e-16	1.41149e-14	26.5855
WFDC1	-1.33633	5.6583	-8.88336	2.65447e-16	1.6108e-14	26.4513
REM1	-1.00324	5.1729	-8.87981	2.71712e-16	1.63812e-14	26.4285
GMFG	-1.23385	8.8362	-8.86491	2.99655e-16	1.80119e-14	26.3325
ESAM	-1.47394	8.3319	-8.86103	3.07406e-16	1.84342e-14	26.3075
C16orf30	-1.06716	7.47684	-8.85322	3.23566e-16	1.93122e-14	26.2573
STIL	1.02583	7.81688	8.81669	4.11159e-16	2.41993e-14	26.0225
UBE2T	1.43851	7.69566	8.80746	4.36774e-16	2.55885e-14	25.9633
SFTPA1	-2.89505	7.45998	-8.80019	4.5808e-16	2.66865e-14	25.9166
KCNN4	1.27047	6.48017	8.79999	4.58665e-16	2.66865e-14	25.9154
SLIT3	-1.62012	6.199	-8.79612	4.70442e-16	2.73093e-14	25.8905
MGC3101	1.30967	6.72064	8.7777	5.30691e-16	3.07366e-14	25.7725
UBE2C	1.17597	7.01421	8.77167	5.52012e-16	3.18264e-14	25.7339
SRGN	-1.50528	10.8073	-8.76865	5.63035e-16	3.23154e-14	25.7145
CLDN3	2.10594	8.15046	8.76732	5.67959e-16	3.25246e-14	25.706
ITGA11	1.38932	5.99494	8.76659	5.70668e-16	3.26063e-14	25.7013
SCARA5	-1.47763	5.31224	-8.76519	5.7592e-16	3.28326e-14	25.6923
CCNF	1.08692	7.83825	8.74106	6.74227e-16	3.82654e-14	25.5379
HSD17B6	-2.07725	7.38564	-8.74062	6.76134e-16	3.82881e-14	25.5351
GIMAP4	-1.23691	10.2259	-8.72604	7.43617e-16	4.19229e-14	25.4419
CTHRC1	1.64741	8.919	8.7221	7.6296e-16	4.29182e-14	25.4168
B3GALNT1	-1.13895	7.57077	-8.70756	8.38814e-16	4.69773e-14	25.3239
GJA12	-1.20057	6.92022	-8.70301	8.64059e-16	4.81789e-14	25.2948
ZBED2	-1.48402	5.96696	-8.70203	8.69563e-16	4.83797e-14	25.2886
VIM	-1.07434	12.2407	-8.6984	8.9038e-16	4.91893e-14	25.2654
GLDN	-1.7351	6.64061	-8.69539	9.08036e-16	4.98691e-14	25.2462
WNT2	-1.10425	6.06078	-8.68973	9.42125e-16	5.14044e-14	25.2101
FCN1	-1.76627	8.20966	-8.68882	9.47681e-16	5.15969e-14	25.2043
PRKCE	-1.06548	6.20618	-8.68741	9.56412e-16	5.18787e-14	25.1954
ALDH1A1	-1.72815	9.05392	-8.68733	9.56939e-16	5.18787e-14	25.1948
LMO7	-1.42677	6.69713	-8.68474	9.73202e-16	5.25364e-14	25.1783
LPXN	-1.05258	9.8832	-8.68429	9.76076e-16	5.25799e-14	25.1754
EGR2	-1.24185	8.03998	-8.6834	9.81749e-16	5.27737e-14	25.1697
GSTM3	-1.63888	7.01168	-8.67886	1.01118e-15	5.42409e-14	25.1408
DPYSL2	-1.01125	11.4625	-8.66724	1.09055e-15	5.82527e-14	25.0668
TM6SF1	-1.24083	6.44832	-8.66356	1.11695e-15	5.95381e-14	25.0433
ID3	-1.22027	9.86262	-8.66317	1.11978e-15	5.9564e-14	25.0409
KIF20A	1.2745	7.57233	8.65796	1.15834e-15	6.13582e-14	25.0077
PFKP	1.10749	10.0168	8.65729	1.16339e-15	6.14975e-14	25.0034
RASEF	1.77416	8.02372	8.65685	1.1667e-15	6.15444e-14	25.0007
IGSF9	1.57377	6.14605	8.65433	1.18596e-15	6.23023e-14	24.9846
CANT1	1.02184	9.18354	8.65121	1.21029e-15	6.34492e-14	24.9647
CYBRD1	-1.22736	9.83205	-8.63224	1.36891e-15	7.13237e-14	24.8441
LHFP	-1.11304	8.36538	-8.63163	1.37431e-15	7.14583e-14	24.8402
DUSP1	-1.3035	12.158	-8.62934	1.39487e-15	7.23794e-14	24.8257
SLC9A9	-1.18141	6.52418	-8.62762	1.41054e-15	7.27474e-14	24.8147
ENC1	1.06374	8.93528	8.61141	1.56694e-15	8.00019e-14	24.7117
PTPRM	-1.29626	8.32702	-8.61063	1.57484e-15	8.02443e-14	24.7068
SHANK3	-1.02651	8.30178	-8.60132	1.67282e-15	8.45588e-14	24.6477
CXCL12	-1.32601	6.72662	-8.60016	1.68541e-15	8.50264e-14	24.6403
TACC3	1.04658	6.93089	8.58466	1.86334e-15	9.36312e-14	24.542
S100A8	-2.14127	10.419	-8.57654	1.9639e-15	9.75276e-14	24.4906
C19orf48	1.18527	7.15314	8.5729	2.01073e-15	9.96584e-14	24.4675
ANXA8L1	-1.72486	4.90041	-8.57258	2.0149e-15	9.9671e-14	24.4654
GIMAP8	-1.30276	8.15036	-8.56317	2.14129e-15	1.05512e-13	24.4059
KIFC1	1.29512	7.31384	8.55936	2.19475e-15	1.07522e-13	24.3817
MGC9712	1.41289	5.61497	8.55468	2.26213e-15	1.10609e-13	24.3521
EMP3	-1.00362	10.4677	-8.5497	2.33616e-15	1.13819e-13	24.3206
TK1	1.32716	8.34197	8.54966	2.33673e-15	1.13819e-13	24.3203
GJA4	-1.27475	6.7413	-8.53855	2.51049e-15	1.21892e-13	24.2501
LRRC32	-1.27433	8.54955	-8.53605	2.55144e-15	1.23332e-13	24.2342
SFTPA2	-3.02988	7.98831	-8.53354	2.59299e-15	1.25103e-13	24.2184
KCTD15	-1.08897	6.04838	-8.53107	2.63476e-15	1.26519e-13	24.2028
PDIA4	1.0134	8.04987	8.53092	2.63726e-15	1.26519e-13	24.2018
IFT57	-1.4072	7.93522	-8.52985	2.65563e-15	1.2698e-13	24.195
ELF3	1.27882	10.3317	8.52977	2.65685e-15	1.2698e-13	24.1946
MYO7A	1.03032	6.24946	8.52555	2.73027e-15	1.30244e-13	24.1679
WISP2	-1.48653	6.36978	-8.51174	2.98465e-15	1.41581e-13	24.0806
HSPB3	-1.421	4.98223	-8.504	3.13727e-15	1.47993e-13	24.0318
DCN	-1.56528	9.62994	-8.47408	3.8039e-15	1.78447e-13	23.8431
AP1S2	-1.01169	9.35564	-8.47212	3.8522e-15	1.80379e-13	23.8308
C7	-2.03166	6.60158	-8.46752	3.9678e-15	1.84771e-13	23.8018
FZD4	-1.07268	8.68505	-8.46053	4.15017e-15	1.92559e-13	23.7578
CD69	-1.42264	6.72454	-8.45818	4.21341e-15	1.95137e-13	23.743
MST1R	1.49974	7.11135	8.45759	4.22957e-15	1.95175e-13	23.7393
ZFHX1B	-1.18617	6.67271	-8.44812	4.49495e-15	2.06297e-13	23.6797
DLL1	-1.37704	7.23511	-8.445	4.58587e-15	2.09713e-13	23.6601
CENPF	1.45346	7.53376	8.44116	4.70029e-15	2.14175e-13	23.6359
COL5A2	1.34936	10.6036	8.43232	4.97483e-15	2.25071e-13	23.5803
ABCA3	-1.96894	8.83784	-8.43128	5.00815e-15	2.26176e-13	23.5738
TMEM47	-1.24342	8.13099	-8.42694	5.14974e-15	2.31717e-13	23.5465
SLFN13	1.26374	6.6945	8.42212	5.31139e-15	2.37342e-13	23.5163
AMICA1	-1.26044	8.40643	-8.4192	5.41173e-15	2.40873e-13	23.4979
CCNB2	1.41291	8.34166	8.419	5.41884e-15	2.40873e-13	23.4966
MSRA	-1.09946	7.83475	-8.41339	5.61732e-15	2.4926e-13	23.4614
C1orf106	1.50918	8.96408	8.41136	5.69082e-15	2.52081e-13	23.4487
CDCA8	1.26256	7.08727	8.4033	5.9925e-15	2.64523e-13	23.3981
LOC388135	-1.09555	4.84757	-8.40204	6.04118e-15	2.6621e-13	23.3902
MCM2	1.2694	8.2472	8.40099	6.08197e-15	2.67544e-13	23.3836
AURKB	1.51933	7.30077	8.39757	6.21659e-15	2.72993e-13	23.3622
PLA2G3	-1.46606	5.21572	-8.3967	6.25146e-15	2.74051e-13	23.3567
CD300LF	-1.36429	7.42925	-8.39531	6.30722e-15	2.75545e-13	23.348
PODXL2	1.74594	7.71319	8.3887	6.57984e-15	2.86147e-13	23.3066
PRICKLE2	-1.04274	8.04125	-8.38861	6.58366e-15	2.86147e-13	23.306
GPR30	-1.15809	5.7223	-8.37703	7.09055e-15	3.06757e-13	23.2334
COL10A1	1.95443	6.81821	8.37598	7.13806e-15	3.08136e-13	23.2269
LOC644743	1.23051	10.6677	8.36756	7.53326e-15	3.23549e-13	23.1741
KIF26B	1.1501	5.33028	8.36202	7.80502e-15	3.34655e-13	23.1394
TGFBR2	-1.04576	8.55669	-8.34564	8.6658e-15	3.69692e-13	23.037
MCM4	1.17736	8.11885	8.33793	9.10366e-15	3.87073e-13	22.9887
TMEM63A	1.2077	7.45482	8.33684	9.16717e-15	3.89122e-13	22.9819
BAIAP2L1	1.21938	9.27066	8.32761	9.72309e-15	4.11347e-13	22.9243
OLR1	-1.64279	9.89944	-8.32577	9.83776e-15	4.14817e-13	22.9128
ASF1B	1.22584	6.57256	8.31323	1.06568e-14	4.46391e-13	22.8346
LRRK2	-1.12802	5.21944	-8.31001	1.08778e-14	4.52665e-13	22.8145
BTG2	-1.23234	9.35891	-8.30863	1.09743e-14	4.55935e-13	22.8058
TIMP3	-1.52368	9.44612	-8.30148	1.14854e-14	4.76393e-13	22.7613
METTL7A	-1.23014	6.65846	-8.29772	1.1764e-14	4.8636e-13	22.7378
CDCA5	1.49788	8.60463	8.29374	1.20662e-14	4.97236e-13	22.713
DES	-1.18285	4.85829	-8.28313	1.29095e-14	5.29414e-13	22.6469
PTGDS	-1.99325	9.38954	-8.27554	1.35476e-14	5.52906e-13	22.5996
IBRDC2	-1.15231	7.98633	-8.26063	1.48949e-14	6.03787e-13	22.5068
C5AR1	-1.36891	7.02428	-8.26044	1.4913e-14	6.03787e-13	22.5056
MYH11	-1.41084	7.71731	-8.25339	1.55962e-14	6.30445e-13	22.4618
COL4A5	-1.48774	6.70948	-8.2514	1.57944e-14	6.36432e-13	22.4495
PGM2L1	1.08066	7.49563	8.24908	1.60293e-14	6.4319e-13	22.435
AURKA	1.36468	8.33602	8.24847	1.60911e-14	6.43289e-13	22.4312
CEECAM1	1.21686	7.31381	8.24808	1.61312e-14	6.4388e-13	22.4288
HMGB3	1.82829	8.6287	8.24594	1.63521e-14	6.50653e-13	22.4155
RAB25	1.16167	10.4029	8.24326	1.66329e-14	6.59763e-13	22.3988
GATA2	-1.04664	5.50117	-8.24141	1.68295e-14	6.66521e-13	22.3873
RASAL1	1.07869	5.44107	8.2364	1.7373e-14	6.86975e-13	22.3562
CDH3	1.9585	8.78537	8.23286	1.77675e-14	7.00399e-13	22.3342
HMMR	1.37561	6.5402	8.22311	1.89013e-14	7.42789e-13	22.2737
ADCY4	-1.27465	7.1901	-8.22039	1.92298e-14	7.54534e-13	22.2568
CDKN1C	-1.07015	6.59362	-8.2091	2.06566e-14	8.06782e-13	22.1868
FLJ13236	1.42881	5.60323	8.20626	2.1032e-14	8.20182e-13	22.1692
KIF2C	1.3501	6.96432	8.1938	2.27579e-14	8.82079e-13	22.092
LEPREL1	-1.61278	9.3861	-8.1917	2.30633e-14	8.92552e-13	22.079
AQP9	-1.45646	7.71924	-8.18588	2.3928e-14	9.20413e-13	22.0429
MGC35295	-1.60124	4.94414	-8.18317	2.43412e-14	9.33651e-13	22.0262
PTRF	-1.01248	10.9595	-8.17279	2.59935e-14	9.9385e-13	21.9619
ITPKA	2.26426	7.452	8.16393	2.74909e-14	1.04953e-12	21.9071
WFDC2	1.01537	5.49441	8.16184	2.78552e-14	1.06184e-12	21.8942
DENND3	-1.01076	6.838	-8.1576	2.8611e-14	1.08657e-12	21.868
COX4I2	-1.29877	6.48987	-8.15741	2.86464e-14	1.08657e-12	21.8668
ZFP36	-1.1934	11.6473	-8.15725	2.8675e-14	1.08657e-12	21.8659
CD33	-1.4012	6.08754	-8.15557	2.89808e-14	1.09653e-12	21.8555
HSD11B1	-1.13802	5.66755	-8.15446	2.91848e-14	1.1026e-12	21.8486
DPT	-1.54349	7.24343	-8.15338	2.93851e-14	1.10853e-12	21.8419
GALNT6	1.27525	6.53422	8.14839	3.03256e-14	1.14231e-12	21.8111
NOTCH4	-1.08496	7.52975	-8.14783	3.04318e-14	1.14333e-12	21.8077
ANKRD25	-1.09349	6.91319	-8.14601	3.07844e-14	1.15446e-12	21.7964
E2F2	1.1495	7.81095	8.13255	3.35116e-14	1.24936e-12	21.7134
FLJ46072	1.11781	9.27436	8.13143	3.37491e-14	1.25638e-12	21.7065
OSR1	-1.50322	7.01018	-8.10921	3.88229e-14	1.43267e-12	21.5694
GAS1	-1.33265	6.55362	-8.10286	4.04053e-14	1.48756e-12	21.5303
SLC22A18AS	1.36135	6.81645	8.10278	4.04273e-14	1.48756e-12	21.5298
GNG11	-1.40806	9.09343	-8.09977	4.11987e-14	1.51157e-12	21.5113
LAMC3	-1.38771	6.9249	-8.09389	4.27527e-14	1.56407e-12	21.4751
MELK	1.42466	7.48755	8.08613	4.48906e-14	1.63993e-12	21.4274
RETN	-1.39739	4.9249	-8.0726	4.88743e-14	1.77525e-12	21.3442
ANLN	1.3039	6.54067	8.06986	4.97228e-14	1.8035e-12	21.3274
XPR1	1.10963	10.0338	8.06278	5.19862e-14	1.87756e-12	21.2838
MX2	1.14942	9.03269	8.05721	5.38343e-14	1.9388e-12	21.2496
VEPH1	-1.35325	4.95261	-8.05295	5.52952e-14	1.98578e-12	21.2235
NOSTRIN	-1.5045	7.61895	-8.04498	5.81278e-14	2.08163e-12	21.1746
C9orf140	1.41329	6.69354	8.03139	6.32994e-14	2.25413e-12	21.0912
APIN	-1.06503	4.54266	-8.02803	6.46452e-14	2.29669e-12	21.0706
SFTPC	-3.66489	11.119	-8.02796	6.46752e-14	2.29669e-12	21.0702
STARD8	-1.0984	6.38919	-8.02749	6.4864e-14	2.30018e-12	21.0673
METTL7B	1.71302	6.61202	8.02644	6.52934e-14	2.31219e-12	21.0609
TTK	1.39735	6.97332	8.02294	6.67418e-14	2.36019e-12	21.0394
DLG7	1.15752	6.79399	8.01834	6.86907e-14	2.42237e-12	21.0113
SLCO2B1	-1.2396	9.38717	-8.00136	7.63929e-14	2.66443e-12	20.9073
CELSR3	1.52074	7.05973	7.99795	7.80369e-14	2.71003e-12	20.8865
PI16	-1.64069	5.36557	-7.99793	7.80464e-14	2.71003e-12	20.8864
CYB5A	-1.24135	10.8718	-7.99781	7.81074e-14	2.71003e-12	20.8856
C2orf11	-1.02862	6.4233	-7.99454	7.97196e-14	2.75775e-12	20.8656
CNN1	-1.23507	5.86811	-7.9914	8.1299e-14	2.80857e-12	20.8465
PROS1	-1.18333	9.75261	-7.98703	8.35532e-14	2.87567e-12	20.8197
C8orf13	-1.44542	6.26005	-7.97851	8.81213e-14	3.01152e-12	20.7677
PVRL4	1.37178	6.202	7.97665	8.91471e-14	3.03841e-12	20.7563
DKFZP686A01247	-1.4675	10.1371	-7.97223	9.16445e-14	3.11935e-12	20.7293
DOCK11	-1.15561	7.81737	-7.96903	9.34902e-14	3.17792e-12	20.7098
COL3A1	1.41502	11.9492	7.96752	9.43784e-14	3.20382e-12	20.7006
CD163	-1.61218	8.36018	-7.95544	1.01763e-13	3.44532e-12	20.6269
RERG	-1.2526	6.26884	-7.94014	1.11945e-13	3.76179e-12	20.5337
C17orf53	1.18014	7.31743	7.93513	1.15494e-13	3.87407e-12	20.5031
SLC39A8	-1.64421	7.42717	-7.92539	1.22719e-13	4.08947e-12	20.4438
PLA2G1B	-2.30909	6.43177	-7.92134	1.2585e-13	4.18281e-12	20.4192
AOX1	-1.19764	5.32277	-7.91496	1.30944e-13	4.32387e-12	20.3804
GADD45B	-1.16656	8.05521	-7.91217	1.33241e-13	4.39401e-12	20.3634
RARRES2	-1.23464	10.6213	-7.9118	1.33543e-13	4.39828e-12	20.3611
TMEM132A	1.2466	7.12544	7.91049	1.34636e-13	4.42852e-12	20.3532
LAMA4	-1.01395	6.85058	-7.90606	1.38399e-13	4.53471e-12	20.3262
SPIRE2	1.46887	7.01061	7.88771	1.55105e-13	5.06251e-12	20.2148
C17orf28	1.21231	6.9622	7.88661	1.5617e-13	5.09073e-12	20.2081
EMP1	-1.13734	10.6777	-7.88538	1.57371e-13	5.11678e-12	20.2006
NUSAP1	1.08158	7.50562	7.88493	1.57805e-13	5.12432e-12	20.1979
MOSC2	-1.12744	6.5028	-7.88284	1.5987e-13	5.18475e-12	20.1852
PILRA	-1.00701	6.41357	-7.8784	1.64329e-13	5.32259e-12	20.1583
MAP3K8	-1.20845	7.75957	-7.87499	1.6785e-13	5.42971e-12	20.1376
UST	-1.18056	6.46741	-7.86067	1.83428e-13	5.90361e-12	20.0508
KDELR2	1.0434	10.0994	7.85793	1.86577e-13	5.99736e-12	20.0342
C10orf132	1.28432	5.32141	7.85621	1.88573e-13	6.05386e-12	20.0238
FOLR3	-1.45539	5.00032	-7.85486	1.90155e-13	6.09696e-12	20.0156
HCAP-G	1.27735	7.24038	7.84207	2.05833e-13	6.55827e-12	19.9382
BUB1	1.29517	6.80826	7.84157	2.06467e-13	6.57024e-12	19.9352
ANKRD22	1.45943	7.25156	7.83761	2.1159e-13	6.71645e-12	19.9112
ACTG2	-1.41395	9.82765	-7.83035	2.2131e-13	6.99878e-12	19.8673
FLJ40629	1.35681	6.90749	7.82811	2.24395e-13	7.07873e-12	19.8538
DAPK2	-1.0092	5.65949	-7.82334	2.3112e-13	7.27285e-12	19.8249
KLF2	-1.1389	11.0352	-7.81917	2.37143e-13	7.45316e-12	19.7998
C9orf150	-1.04942	5.70058	-7.8154	2.42741e-13	7.61026e-12	19.777
DEPDC6	1.22729	7.27158	7.80739	2.55059e-13	7.92803e-12	19.7286
PRNP	-1.01615	10.2475	-7.80524	2.58465e-13	8.02411e-12	19.7156
ERO1L	1.12598	8.91909	7.77955	3.02845e-13	9.29969e-12	19.5607
KIF4A	1.28443	5.6811	7.77443	3.1255e-13	9.56304e-12	19.5299
EDG6	-1.02313	6.15298	-7.77309	3.15139e-13	9.63069e-12	19.5218
HCK	-1.19484	8.03769	-7.76647	3.28265e-13	1.00077e-11	19.482
KCNA5	-1.03788	5.10189	-7.75361	3.55314e-13	1.07818e-11	19.4046
RECQL4	1.33954	5.84874	7.75081	3.61474e-13	1.09415e-11	19.3878
AQP11	1.02564	5.39953	7.74595	3.72458e-13	1.12472e-11	19.3585
TPX2	1.42601	6.83612	7.73637	3.95031e-13	1.18724e-11	19.301
LOC647954	1.2131	7.8968	7.73185	4.06176e-13	1.21638e-11	19.2738
ASPM	1.37441	7.56221	7.72639	4.20017e-13	1.25051e-11	19.2411
PHLDA2	1.16658	6.58222	7.7231	4.28598e-13	1.27011e-11	19.2213
SUSD2	-2.02389	10.4857	-7.71832	4.41351e-13	1.30334e-11	19.1927
NGFRAP1L1	-1.33235	5.77615	-7.71337	4.5498e-13	1.33893e-11	19.163
SDHAP3	1.35093	6.58209	7.70268	4.85815e-13	1.42144e-11	19.0989
ALOX5AP	-1.50053	10.76	-7.69985	4.94297e-13	1.44294e-11	19.082
MAOB	-1.21578	5.64547	-7.69862	4.98046e-13	1.45221e-11	19.0746
ID1	-1.33149	7.99628	-7.69734	5.0198e-13	1.45956e-11	19.0669
C18orf34	-1.09993	4.77378	-7.69705	5.02861e-13	1.45956e-11	19.0652
SFN	1.60742	9.33915	7.69196	5.188e-13	1.49558e-11	19.0347
BIRC5	1.22617	6.27024	7.68041	5.5681e-13	1.59611e-11	18.9656
OSCAR	-1.02053	7.30577	-7.66619	6.07436e-13	1.72759e-11	18.8806
LPHN2	-1.14477	7.36659	-7.6655	6.09993e-13	1.73293e-11	18.8765
HSH2D	1.12903	6.98752	7.665	6.11859e-13	1.73629e-11	18.8735
STON1	-1.04549	5.19917	-7.65463	6.51919e-13	1.84585e-11	18.8116
AADAC	-1.70077	5.65289	-7.64878	6.75627e-13	1.90872e-11	18.7767
IL6	-2.0259	7.87953	-7.64822	6.77936e-13	1.91312e-11	18.7733
DCBLD1	1.06167	7.78823	7.64291	7.00284e-13	1.96963e-11	18.7416
LOC441763	1.00863	11.1395	7.64153	7.06217e-13	1.98412e-11	18.7334
NDN	-1.22093	9.52703	-7.62002	8.05249e-13	2.25239e-11	18.6052
FLJ13909	1.14283	6.16237	7.61919	8.09338e-13	2.26135e-11	18.6003
FOSB	-2.0098	10.7782	-7.59377	9.44839e-13	2.60558e-11	18.4491
SLC25A10	1.01147	7.12385	7.59259	9.51674e-13	2.61875e-11	18.442
RHPN2	1.23014	9.92516	7.58915	9.71788e-13	2.66545e-11	18.4216
C1QA	-1.32828	8.77022	-7.58453	9.99461e-13	2.73545e-11	18.3942
ANXA3	-1.44232	5.87609	-7.57797	1.04014e-12	2.83762e-11	18.3552
LOC144501	1.11713	6.20064	7.57771	1.04174e-12	2.83895e-11	18.3537
KIF14	1.00962	6.37008	7.57318	1.07082e-12	2.91188e-11	18.3268
CHEK1	1.18234	6.72726	7.57301	1.07194e-12	2.91188e-11	18.3258
CDC45L	1.3348	7.70673	7.55644	1.18537e-12	3.19949e-11	18.2276
MMP15	1.09105	6.71165	7.5528	1.21185e-12	3.26058e-11	18.206
DNAJC12	2.01258	7.01523	7.54684	1.25651e-12	3.37005e-11	18.1706
ANKRD1	-1.27995	5.0473	-7.53385	1.35939e-12	3.63065e-11	18.0938
SPC24	1.14123	7.70804	7.51981	1.47999e-12	3.92389e-11	18.0108
FAM46B	-1.34208	6.31744	-7.5176	1.49998e-12	3.97275e-11	17.9977
ATP1B1	1.03835	11.1948	7.51392	1.53372e-12	4.04106e-11	17.976
NTRK2	-1.1951	4.68353	-7.50971	1.57327e-12	4.13672e-11	17.9511
SALL4	1.45724	6.00076	7.5072	1.59738e-12	4.19143e-11	17.9363
FAM83E	1.40473	6.82769	7.5053	1.61576e-12	4.22223e-11	17.9251
SLC29A4	1.16496	6.34923	7.49798	1.68882e-12	4.3906e-11	17.8819
GPBAR1	-1.03049	5.46591	-7.48827	1.79094e-12	4.63711e-11	17.8246
IL7R	-1.32311	9.15729	-7.4818	1.86225e-12	4.81685e-11	17.7865
TPSAB1	-1.873	8.6497	-7.48095	1.87181e-12	4.83664e-11	17.7815
SFTPD	-2.46632	11.5277	-7.47808	1.90451e-12	4.91117e-11	17.7645
PLXNA3	1.00131	7.79222	7.47684	1.91883e-12	4.94308e-11	17.7572
C22orf18	1.2473	6.14176	7.47267	1.9676e-12	5.05847e-11	17.7327
C1orf135	1.15214	5.78062	7.47055	1.99301e-12	5.11861e-11	17.7202
DOCK2	-1.15398	9.14921	-7.46958	2.0047e-12	5.14343e-11	17.7145
GRHL2	1.00413	6.84255	7.45683	2.16483e-12	5.52642e-11	17.6395
ADHFE1	-1.01881	6.12547	-7.45134	2.23752e-12	5.69481e-11	17.6072
DKFZp762E1312	1.33861	6.92091	7.44549	2.31771e-12	5.85205e-11	17.5729
PPP1R16B	-1.1766	6.85928	-7.44508	2.32346e-12	5.86074e-11	17.5704
LOC89944	1.48183	6.44351	7.44263	2.35797e-12	5.93601e-11	17.556
CYP27A1	-1.18742	9.24903	-7.43971	2.39985e-12	6.03547e-11	17.5389
RAB15	1.18293	5.99776	7.43217	2.51108e-12	6.29031e-11	17.4946
SLC41A2	1.01052	6.03054	7.42977	2.54766e-12	6.37568e-11	17.4805
CDK6	-1.26791	8.00154	-7.41924	2.71395e-12	6.77183e-11	17.4188
CHTF18	1.15048	6.779	7.41597	2.7679e-12	6.89966e-11	17.3996
RPESP	-1.57795	5.92947	-7.4149	2.78577e-12	6.93741e-11	17.3933
SCG5	1.51369	7.85909	7.41298	2.81808e-12	7.01101e-11	17.382
ENPP2	-1.39531	8.22417	-7.40808	2.90208e-12	7.19887e-11	17.3534
ZNF533	-1.79218	6.74536	-7.40621	2.93492e-12	7.26613e-11	17.3424
RGS17	1.81689	7.43133	7.4044	2.96699e-12	7.3384e-11	17.3318
DGCR5	1.26814	5.77775	7.4008	3.03168e-12	7.48384e-11	17.3107
RBP1	-1.36881	9.21736	-7.39726	3.09681e-12	7.63721e-11	17.29
CMKOR1	-1.54948	9.29452	-7.38941	3.24597e-12	7.97411e-11	17.2441
HES6	1.60345	8.43092	7.38089	3.41589e-12	8.35922e-11	17.1943
ID2	-1.0182	9.02135	-7.37844	3.46646e-12	8.46668e-11	17.1799
EDG8	-1.42326	5.48873	-7.37082	3.62836e-12	8.83667e-11	17.1354
SPINK1	3.31605	8.46428	7.36907	3.66636e-12	8.92067e-11	17.1252
CXCL2	-1.74468	7.99889	-7.36538	3.74827e-12	9.10254e-11	17.1037
WIF1	-1.7719	5.44669	-7.36279	3.80693e-12	9.22736e-11	17.0885
IER5L	1.07558	7.16261	7.36154	3.83534e-12	9.27026e-11	17.0812
TMEM178	-1.14448	5.42273	-7.3591	3.89188e-12	9.39743e-11	17.067
FPR1	-1.53988	7.20402	-7.34876	4.13982e-12	9.95828e-11	17.0067
HDC	-1.44689	6.79692	-7.33996	4.36317e-12	1.0456e-10	16.9554
KIF11	1.03735	6.4368	7.32982	4.63545e-12	1.10772e-10	16.8963
TLCD1	1.14112	7.69195	7.32667	4.72334e-12	1.12766e-10	16.878
TNRC9	1.02933	4.7153	7.32497	4.77165e-12	1.13706e-10	16.8681
GREM1	1.22969	6.05545	7.32245	4.84368e-12	1.15314e-10	16.8535
GLT25D2	-1.21192	5.01139	-7.31681	5.00938e-12	1.19147e-10	16.8207
CD9	-1.24087	8.39492	-7.30496	5.37587e-12	1.27269e-10	16.7518
BMP6	-1.14403	5.39499	-7.30479	5.38139e-12	1.27281e-10	16.7508
TYROBP	-1.23064	11.1926	-7.30395	5.40821e-12	1.27797e-10	16.7459
CEP55	1.17997	7.55235	7.30283	5.44449e-12	1.28296e-10	16.7394
SULF1	1.53253	9.49616	7.30179	5.47814e-12	1.2897e-10	16.7334
ARHGAP15	-1.01163	8.2964	-7.29704	5.63532e-12	1.32303e-10	16.7058
MGP	-1.37015	11.5437	-7.29419	5.73177e-12	1.34195e-10	16.6892
HKDC1	1.72298	6.58983	7.26973	6.62855e-12	1.52661e-10	16.5474
PTK6	1.10881	6.70444	7.2675	6.717e-12	1.54279e-10	16.5345
FLJ35880	-1.12885	5.46715	-7.26675	6.74701e-12	1.54688e-10	16.5301
SLC7A7	-1.16345	9.46635	-7.2653	6.80539e-12	1.55886e-10	16.5217
JAZF1	-1.03586	6.34013	-7.26351	6.87802e-12	1.57408e-10	16.5114
SPAG4	1.16807	6.35346	7.26067	6.99508e-12	1.59943e-10	16.4949
ZFP36L2	-1.09248	7.48128	-7.25832	7.09323e-12	1.62042e-10	16.4813
PGC	-3.20597	9.09016	-7.25729	7.13656e-12	1.62739e-10	16.4754
MUC20	1.63953	8.13663	7.24963	7.46828e-12	1.69416e-10	16.4311
PRR11	1.09677	5.96256	7.24955	7.47194e-12	1.69416e-10	16.4306
PAK6	1.04197	6.57382	7.24946	7.47599e-12	1.69416e-10	16.43
TROAP	1.26061	6.49531	7.24496	7.67815e-12	1.73688e-10	16.404
PTGES	1.53997	7.73621	7.24396	7.72368e-12	1.74562e-10	16.3983
FOXM1	1.18766	6.12941	7.2422	7.80466e-12	1.76236e-10	16.3881
NRIP3	1.26562	7.93818	7.24031	7.89229e-12	1.77741e-10	16.3772
DENND2A	-1.14655	7.25816	-7.21872	8.96863e-12	2.00208e-10	16.2525
CBLC	1.37531	6.55157	7.21459	9.18995e-12	2.04609e-10	16.2287
CAPN12	1.47674	7.88275	7.21419	9.21169e-12	2.04914e-10	16.2264
UNQ5783	-1.04423	6.09674	-7.20937	9.47842e-12	2.09746e-10	16.1986
CXCR7	-1.56709	7.76035	-7.19484	1.03277e-11	2.27155e-10	16.1149
SOX18	-1.27601	9.14607	-7.18953	1.06564e-11	2.33981e-10	16.0843
ALDH1A2	-1.16467	6.03747	-7.18938	1.06656e-11	2.33981e-10	16.0835
XKRX	1.59668	5.98488	7.18598	1.08817e-11	2.37493e-10	16.0639
TLR4	-1.04319	5.58335	-7.18334	1.10526e-11	2.40635e-10	16.0487
CA2	-1.48772	8.14508	-7.17987	1.12814e-11	2.44327e-10	16.0288
ESPN	1.31834	5.79289	7.15902	1.27557e-11	2.73231e-10	15.909
PTTG1	1.06627	9.17872	7.15827	1.28121e-11	2.74208e-10	15.9047
FLJ10178	-1.17119	6.12778	-7.15406	1.31334e-11	2.80142e-10	15.8805
NKD2	-1.26965	8.79742	-7.14251	1.40564e-11	2.98328e-10	15.8143
S100A4	-1.15515	11.4587	-7.11631	1.63938e-11	3.45056e-10	15.6643
Pfs2	1.29325	7.64446	7.10328	1.7695e-11	3.70298e-10	15.5899
ISG15	1.11761	10.0327	7.09906	1.81381e-11	3.78637e-10	15.5658
UHMK1	1.12821	7.20638	7.09422	1.866e-11	3.87621e-10	15.5381
ZBTB16	-1.32689	5.7463	-7.09114	1.89989e-11	3.94017e-10	15.5206
FLJ22662	-1.19226	9.62442	-7.08344	1.98755e-11	4.10364e-10	15.4766
LY86	-1.25285	8.57561	-7.07367	2.10434e-11	4.33239e-10	15.4209
CDKN3	1.31602	6.84172	7.05328	2.37047e-11	4.79487e-10	15.3049
BCMO1	1.33503	5.253	7.04429	2.49803e-11	5.01697e-10	15.2538
CCNA2	1.13678	7.24317	7.03678	2.60984e-11	5.22091e-10	15.2111
LAPTM4B	1.16492	11.3066	7.03204	2.68291e-11	5.35444e-10	15.1842
FMO3	-1.37735	7.26832	-7.02928	2.7264e-11	5.43697e-10	15.1685
AQP1	-1.03953	6.19519	-7.02415	2.8091e-11	5.59313e-10	15.1394
CTSG	-1.70326	6.48122	-7.02206	2.84343e-11	5.65705e-10	15.1276
CLIC3	-1.47678	8.50278	-6.98715	3.48297e-11	6.8174e-10	14.9299
RGS18	-1.00612	6.31922	-6.97492	3.73913e-11	7.26287e-10	14.8608
POLQ	1.13094	6.80812	6.96968	3.85436e-11	7.46958e-10	14.8312
PTTG3	1.03549	8.28458	6.96114	4.04979e-11	7.81852e-10	14.783
AGR2	1.7931	7.35128	6.95401	4.2204e-11	8.12938e-10	14.7428
C6orf105	-1.06076	5.40899	-6.9506	4.30461e-11	8.27279e-10	14.7236
IRF8	-1.08834	9.21799	-6.9458	4.42577e-11	8.46087e-10	14.6965
LRRC33	-1.04872	6.65885	-6.94418	4.4674e-11	8.53405e-10	14.6874
TMC5	1.35107	6.72857	6.94382	4.47662e-11	8.54523e-10	14.6854
TESC	2.16423	8.50933	6.94021	4.57111e-11	8.69947e-10	14.6651
CDT1	1.19102	6.74184	6.93632	4.67511e-11	8.87747e-10	14.6431
PCSK1N	1.78517	6.0675	6.93065	4.83056e-11	9.12496e-10	14.6113
WNT3	1.05152	6.61305	6.92745	4.92075e-11	9.24611e-10	14.5933
LYZ	-1.56052	8.58224	-6.88922	6.13389e-11	1.13674e-09	14.3786
TRIM46	1.1388	5.29318	6.889	6.1417e-11	1.13736e-09	14.3774
KRT4	-1.21932	4.62713	-6.88554	6.26519e-11	1.15764e-09	14.358
GLIPR1	-1.17998	7.46978	-6.88526	6.27497e-11	1.15782e-09	14.3565
FLJ33641	-1.00356	5.98493	-6.88489	6.28858e-11	1.15949e-09	14.3544
IL18R1	-1.0081	6.2827	-6.88042	6.45219e-11	1.18663e-09	14.3294
TAF13	1.1151	6.5192	6.88027	6.45781e-11	1.18663e-09	14.3285
SPON1	-1.34008	8.5713	-6.88023	6.45913e-11	1.18663e-09	14.3283
EEF1A2	2.69315	7.37346	6.87672	6.59084e-11	1.2056e-09	14.3087
LIFR	-1.0147	5.07651	-6.87368	6.70719e-11	1.22512e-09	14.2916
CD53	-1.18589	7.21516	-6.86255	7.14978e-11	1.29296e-09	14.2294
SNAI2	-1.26091	6.60015	-6.85074	7.65105e-11	1.37384e-09	14.1634
VEGFC	-1.239	6.62897	-6.84581	7.87041e-11	1.40826e-09	14.1359
CYP27B1	1.05313	6.41223	6.8336	8.44085e-11	1.50187e-09	14.0678
CEACAM6	2.04207	12.7998	6.82687	8.77236e-11	1.55433e-09	14.0303
TMPRSS4	1.1654	6.08242	6.82437	8.89902e-11	1.57567e-09	14.0163
CLDN9	1.04921	5.66599	6.81983	9.13316e-11	1.61137e-09	13.991
OLFML2A	-1.10532	7.6493	-6.81972	9.13866e-11	1.61137e-09	13.9904
CSTA	-1.16325	4.99803	-6.80057	1.01956e-10	1.78045e-09	13.8839
LOC200810	1.40686	7.54833	6.78446	1.11771e-10	1.93457e-09	13.7944
PLOD2	1.07226	7.5858	6.77403	1.18614e-10	2.04052e-09	13.7366
SPARC	-1.04981	11.0007	-6.76151	1.27375e-10	2.17651e-09	13.6672
FCER1G	-1.19174	10.4339	-6.75181	1.34605e-10	2.29081e-09	13.6135
XAGE1	1.66001	5.90572	6.73508	1.4802e-10	2.49739e-09	13.5211
CP	1.49223	6.71198	6.72597	1.55874e-10	2.62468e-09	13.4708
KLRB1	-1.34932	8.22638	-6.72503	1.56711e-10	2.63702e-09	13.4655
CFB	1.42236	10.6479	6.72326	1.58286e-10	2.65825e-09	13.4558
SLPI	-1.72603	10.6404	-6.72313	1.58405e-10	2.65849e-09	13.4551
FLJ10986	-1.05028	8.65988	-6.71507	1.65807e-10	2.77538e-09	13.4107
F12	1.27673	7.11223	6.71338	1.67405e-10	2.79295e-09	13.4013
FLJ14054	-1.15396	5.35388	-6.7051	1.75441e-10	2.91363e-09	13.3557
ALPL	-1.67063	9.94117	-6.70043	1.80138e-10	2.97996e-09	13.33
CTGF	-1.06821	11.5994	-6.69459	1.86189e-10	3.06807e-09	13.2979
SGCE	-1.13901	9.3331	-6.68513	1.9642e-10	3.2283e-09	13.2458
KIF15	1.0055	6.56101	6.68133	2.00673e-10	3.28573e-09	13.225
IGFBP3	1.08843	10.2363	6.68118	2.00843e-10	3.28612e-09	13.2242
TYMS	1.17978	8.22197	6.67497	2.08012e-10	3.39686e-09	13.19
CST1	2.23944	6.94233	6.67371	2.09495e-10	3.41012e-09	13.1831
CNFN	1.21897	7.3763	6.66929	2.14793e-10	3.48967e-09	13.1588
LOC653509	-1.38282	8.00113	-6.66803	2.16325e-10	3.51007e-09	13.1519
KDELR3	1.04721	7.40978	6.66381	2.21531e-10	3.58763e-09	13.1288
THY1	1.03754	9.67958	6.6637	2.2167e-10	3.58763e-09	13.1282
FAAH	1.05982	7.32353	6.65393	2.34224e-10	3.7812e-09	13.0746
HK3	-1.09953	7.14389	-6.65195	2.36855e-10	3.82124e-09	13.0637
SLC1A1	-1.02635	5.09579	-6.62551	2.74832e-10	4.38112e-09	12.9191
C1QB	-1.159	11.2988	-6.62274	2.79149e-10	4.44435e-09	12.9039
LOC340243	1.21202	5.97829	6.6206	2.8252e-10	4.4896e-09	12.8923
AHDC1	1.06218	6.5871	6.6199	2.83637e-10	4.50454e-09	12.8884
CD37	-1.2769	7.41016	-6.61403	2.93141e-10	4.6352e-09	12.8564
NEDD4L	-1.07444	8.39047	-6.61387	2.93409e-10	4.63655e-09	12.8555
FCGR1B	-1.13383	6.04384	-6.61327	2.94388e-10	4.64625e-09	12.8522
TM4SF11	-1.21404	7.58668	-6.61016	2.99579e-10	4.72524e-09	12.8352
LOC652726	1.19258	7.54686	6.60792	3.03354e-10	4.7759e-09	12.8231
CEACAM5	2.2603	6.80548	6.59711	3.22326e-10	5.03407e-09	12.7641
F13A1	-1.39641	6.75759	-6.5942	3.27614e-10	5.10411e-09	12.7483
MS4A6A	-1.10076	9.42126	-6.59384	3.28274e-10	5.11127e-09	12.7463
SPATA18	-1.26193	6.49974	-6.58816	3.38892e-10	5.26691e-09	12.7153
FLJ46266	-1.68214	5.64442	-6.58671	3.41653e-10	5.30657e-09	12.7075
ITLN1	-1.56338	5.68146	-6.58508	3.4479e-10	5.35203e-09	12.6986
EPB41L3	-1.10251	7.78778	-6.58455	3.45799e-10	5.36442e-09	12.6957
STK32A	1.41178	5.32526	6.58075	3.53232e-10	5.46972e-09	12.6751
ECT2	1.08259	8.22768	6.55017	4.19068e-10	6.39569e-09	12.5089
HS3ST1	1.14362	6.87634	6.54755	4.25239e-10	6.47432e-09	12.4947
PDLIM3	-1.04902	8.3083	-6.54565	4.29747e-10	6.52733e-09	12.4844
SCGB3A2	-2.42832	9.3288	-6.53254	4.62346e-10	6.98491e-09	12.4134
CHPT1	-1.06142	7.38367	-6.53172	4.64445e-10	7.00347e-09	12.409
SLCO2A1	-1.2063	9.324	-6.52902	4.7148e-10	7.0976e-09	12.3944
SCGB1A1	-3.06032	9.77541	-6.52724	4.76195e-10	7.1601e-09	12.3847
A2M	-1.18618	10.2792	-6.52332	4.86676e-10	7.30473e-09	12.3635
HBG1	-1.15769	4.91069	-6.52213	4.89914e-10	7.349e-09	12.3571
FLJ14082	1.01982	5.45607	6.51946	4.97261e-10	7.45042e-09	12.3426
PLXNB3	1.09933	5.01227	6.48193	6.12476e-10	9.0382e-09	12.1401
RHOD	1.1814	8.10978	6.48115	6.15118e-10	9.07192e-09	12.1359
DSP	1.00034	6.55114	6.4729	6.43886e-10	9.43055e-09	12.0915
MXRA5	1.03586	10.8825	6.45686	7.03641e-10	1.02256e-08	12.0053
CLEC4A	-1.05555	7.01863	-6.45532	7.0966e-10	1.0299e-08	11.997
PDGFRA	-1.04126	7.8988	-6.44911	7.34442e-10	1.06465e-08	11.9636
TMEM118	1.01458	7.34778	6.43991	7.72725e-10	1.11632e-08	11.9143
UNQ3045	1.21817	5.07391	6.42685	8.30441e-10	1.19024e-08	11.8443
HBG2	-1.27796	4.83041	-6.4135	8.93817e-10	1.27246e-08	11.7729
C10orf107	-1.01138	4.97491	-6.41038	9.09295e-10	1.2916e-08	11.7562
MNDA	-1.20383	5.96627	-6.40476	9.37885e-10	1.32924e-08	11.7261
SLC7A5	1.16979	9.26608	6.403	9.4696e-10	1.3389e-08	11.7168
CCNB1	1.0009	5.65685	6.38424	1.04982e-09	1.46906e-08	11.6166
RND3	-1.03468	8.68408	-6.3821	1.0622e-09	1.4823e-08	11.6052
LOC644151	1.94545	8.54975	6.37004	1.13484e-09	1.57589e-08	11.541
NCF1C	-1.1785	6.76441	-6.36302	1.17937e-09	1.63149e-08	11.5036
C20orf102	1.71368	6.68533	6.35297	1.24606e-09	1.71627e-08	11.4502
A4GALT	-1.07728	7.19915	-6.34782	1.28169e-09	1.75963e-08	11.4229
ZNF239	1.00114	6.63766	6.33553	1.37074e-09	1.8748e-08	11.3576
CDCA3	1.1408	5.95566	6.33345	1.38643e-09	1.89319e-08	11.3466
RAMP1	1.21527	7.32967	6.32363	1.46276e-09	1.98782e-08	11.2946
PTGIS	-1.27371	7.16225	-6.31504	1.53288e-09	2.07535e-08	11.2491
C6orf32	-1.13887	7.33248	-6.31303	1.54983e-09	2.09607e-08	11.2384
PLAC8	-1.35377	8.19948	-6.3094	1.58079e-09	2.13452e-08	11.2192
TFAP2C	1.19124	7.7193	6.30549	1.61483e-09	2.17702e-08	11.1986
TJP3	1.2466	8.53098	6.30218	1.6442e-09	2.21193e-08	11.1811
TBX2	-1.09423	8.03532	-6.29892	1.67361e-09	2.24793e-08	11.1639
KCNK12	1.3167	6.42346	6.29525	1.70732e-09	2.29199e-08	11.1445
FLJ40919	-1.60846	5.42714	-6.28965	1.76011e-09	2.35664e-08	11.115
XDH	1.13915	5.26994	6.28417	1.81335e-09	2.41774e-08	11.086
FLJ23191	-1.54307	8.36496	-6.28265	1.82837e-09	2.43648e-08	11.078
MAN1C1	-1.05262	6.75349	-6.2801	1.85391e-09	2.46664e-08	11.0646
LOC400987	1.45523	6.51496	6.27643	1.89129e-09	2.5085e-08	11.0452
SFTPB	-1.6344	8.6643	-6.27485	1.90758e-09	2.52748e-08	11.0369
CCL21	-1.3079	8.40715	-6.26728	1.98752e-09	2.62382e-08	10.997
ST6GALNAC1	1.61649	6.73487	6.24822	2.20386e-09	2.881e-08	10.8968
CGN	1.33483	10.2128	6.24811	2.20516e-09	2.88122e-08	10.8962
HLA-DQA1	-1.37243	11.0963	-6.24621	2.22795e-09	2.9065e-08	10.8862
MAL	-1.13644	7.05762	-6.24483	2.24466e-09	2.9253e-08	10.879
FGL2	-1.20205	8.58247	-6.24261	2.27174e-09	2.95404e-08	10.8673
RNU33	1.00443	7.05764	6.23933	2.31246e-09	2.99983e-08	10.8501
KIAA1688	1.06894	8.03303	6.23272	2.39655e-09	3.09313e-08	10.8155
FAP	1.05679	7.63681	6.23218	2.40354e-09	3.10058e-08	10.8126
HABP2	1.51207	5.53575	6.2251	2.49729e-09	3.21336e-08	10.7755
DDIT4L	1.48083	6.87647	6.22324	2.52259e-09	3.24427e-08	10.7657
TBC1D3B	1.06412	6.80876	6.20923	2.72061e-09	3.47959e-08	10.6924
EFCAB1	-1.47918	5.81262	-6.19289	2.97093e-09	3.76377e-08	10.6071
FOXA3	1.60147	5.96981	6.18125	3.16306e-09	3.98928e-08	10.5463
IGF2BP3	1.60042	7.31372	6.18113	3.16503e-09	3.98979e-08	10.5457
SLC5A3	1.11221	6.17642	6.16129	3.52091e-09	4.40347e-08	10.4423
PCP4	2.05306	7.07028	6.15395	3.66235e-09	4.56465e-08	10.4041
FBP1	-1.06291	10.4475	-6.14807	3.77943e-09	4.69446e-08	10.3736
FOS	-1.04889	11.0052	-6.13134	4.13365e-09	5.06517e-08	10.2868
LCN2	1.80039	10.4895	6.13079	4.1457e-09	5.07503e-08	10.284
NGEF	1.04236	5.19999	6.11796	4.43992e-09	5.3911e-08	10.2175
RPL39L	1.04484	8.06171	6.11755	4.4497e-09	5.40038e-08	10.2154
GPR37	1.34523	6.23463	6.10619	4.72792e-09	5.70536e-08	10.1566
GLULD1	1.61867	5.82074	6.08858	5.19294e-09	6.19886e-08	10.0656
C20orf59	1.06182	5.5745	6.08545	5.28015e-09	6.29409e-08	10.0495
ATP10B	1.44816	6.62874	6.07717	5.51812e-09	6.55319e-08	10.0068
ProSAPiP1	1.1525	7.65453	6.06446	5.90346e-09	6.97497e-08	9.94136
HMOX1	-1.08081	7.68895	-6.06403	5.91714e-09	6.98465e-08	9.93912
NCF1	-1.25426	5.83448	-6.05605	6.17311e-09	7.24642e-08	9.89809
FAM64A	1.11132	6.22459	6.05066	6.35214e-09	7.41942e-08	9.87039
RRM2	1.03649	5.32445	6.04385	6.58533e-09	7.6666e-08	9.83545
PPP1R14D	1.08715	5.90929	6.04168	6.6615e-09	7.74818e-08	9.82431
LILRA2	-1.05108	5.13782	-6.03987	6.72582e-09	7.81228e-08	9.815
CPVL	-1.12129	9.15587	-6.02107	7.42893e-09	8.53924e-08	9.71868
LOC649841	1.35666	8.66986	6.01942	7.49407e-09	8.60245e-08	9.71022
VSNL1	-1.23348	5.09914	-6.0099	7.88049e-09	8.99617e-08	9.66152
IL1B	-1.34841	7.11144	-6.00758	7.97758e-09	9.08772e-08	9.64966
LOC643977	1.21339	6.57606	6.00613	8.03868e-09	9.15322e-08	9.64227
PENK	-1.52797	4.90771	-6.00473	8.09828e-09	9.21283e-08	9.63512
NMU	1.56548	6.03162	6.00274	8.18384e-09	9.30185e-08	9.62494
LOC388743	1.28834	6.40876	5.99839	8.37355e-09	9.48348e-08	9.60274
C20orf85	-1.58807	5.72198	-5.99831	8.37721e-09	9.48348e-08	9.60232
CCL2	-1.12782	10.3036	-5.99174	8.67214e-09	9.76951e-08	9.56881
MESP1	1.16667	6.90113	5.99055	8.72679e-09	9.82237e-08	9.56273
SLC2A5	1.19188	7.1269	5.99017	8.74423e-09	9.83765e-08	9.56079
GJB2	1.62033	7.7916	5.98975	8.76384e-09	9.85534e-08	9.55862
SLC44A4	1.16329	9.78481	5.98658	8.91113e-09	1.00033e-07	9.54248
CSPG2	1.18184	9.15676	5.98432	9.01761e-09	1.0105e-07	9.53098
SCIN	1.46885	7.26823	5.97632	9.40567e-09	1.0512e-07	9.49018
FOLR2	-1.12422	7.01209	-5.97582	9.43011e-09	1.05347e-07	9.48766
TGFA	1.1449	6.87494	5.97273	9.58483e-09	1.06935e-07	9.47191
GLT8D2	-1.00049	7.17608	-5.96337	1.00677e-08	1.11733e-07	9.42432
MAOA	-1.0302	10.7825	-5.95948	1.02754e-08	1.13939e-07	9.40455
REEP1	-1.1329	5.88034	-5.95457	1.05436e-08	1.1676e-07	9.37959
SIX1	1.22092	5.61739	5.94992	1.08037e-08	1.1938e-07	9.356
MGC42105	-1.00181	4.76478	-5.93916	1.14305e-08	1.2576e-07	9.3014
PLEK	-1.08001	9.28229	-5.93809	1.14949e-08	1.26359e-07	9.29596
BIK	1.12878	6.2805	5.93365	1.17648e-08	1.29104e-07	9.27349
HRASLS	1.13381	5.29279	5.92974	1.20083e-08	1.31435e-07	9.25367
KCNK1	1.09125	7.15605	5.91153	1.32072e-08	1.43139e-07	9.16155
LOC653219	1.43108	6.07661	5.89331	1.45236e-08	1.56015e-07	9.0696
DSG2	1.13851	7.5442	5.88898	1.48545e-08	1.59296e-07	9.0478
ANKRD38	-1.02305	6.36892	-5.88852	1.48906e-08	1.59615e-07	9.04545
LOC647673	-1.02634	8.01263	-5.88185	1.5416e-08	1.64485e-07	9.01189
LOC648075	1.10749	6.0661	5.87369	1.60844e-08	1.70685e-07	8.97083
CT45-4	-1.57394	5.30227	-5.8572	1.75227e-08	1.84704e-07	8.88796
TRIM22	-1.01918	8.27819	-5.84883	1.82996e-08	1.92425e-07	8.84599
GUCY1B2	1.21246	5.92325	5.84654	1.85184e-08	1.94378e-07	8.8345
FLJ36445	1.17424	7.08244	5.8403	1.91265e-08	1.99963e-07	8.80324
LOC387934	-1.04857	5.93953	-5.83617	1.95405e-08	2.03705e-07	8.78253
CD24	1.11735	10.0233	5.8271	2.04791e-08	2.12298e-07	8.73715
MT1X	-1.26563	10.5673	-5.82392	2.08186e-08	2.15614e-07	8.72125
C20orf42	1.24293	6.44419	5.80896	2.24901e-08	2.30764e-07	8.64656
RHBDL1	1.14161	5.95488	5.80275	2.32213e-08	2.37691e-07	8.61562
FGF11	1.00299	5.94077	5.79625	2.40134e-08	2.44814e-07	8.58318
GBP4	-1.10274	8.76923	-5.79575	2.40754e-08	2.45249e-07	8.58069
PPP1R3C	-1.16218	7.37278	-5.78336	2.56608e-08	2.59734e-07	8.51903
F2RL1	1.04863	7.20674	5.78119	2.59476e-08	2.62428e-07	8.50828
ITGAM	-1.07541	7.31207	-5.78011	2.60926e-08	2.6379e-07	8.50289
KIF12	1.21576	5.34969	5.77706	2.65053e-08	2.67643e-07	8.48772
TMEM37	-1.00585	6.08372	-5.76556	2.81181e-08	2.82135e-07	8.43062
CYBB	-1.17602	8.14677	-5.75715	2.9358e-08	2.92728e-07	8.3889
FOXD2	1.00828	6.26764	5.7519	3.01591e-08	2.99658e-07	8.36288
TRIM2	1.06018	8.52772	5.74712	3.09065e-08	3.06485e-07	8.33922
IL1A	-1.42455	5.12671	-5.73906	3.22084e-08	3.17539e-07	8.29934
COL9A2	1.32812	7.32922	5.73872	3.22648e-08	3.17971e-07	8.29765
C9orf24	-1.18331	5.80774	-5.73505	3.28757e-08	3.23365e-07	8.27952
GZMH	-1.06846	8.07569	-5.73087	3.35867e-08	3.29721e-07	8.25884
C22orf15	-1.04147	5.32908	-5.72954	3.38147e-08	3.3183e-07	8.25231
LMTK3	1.07433	8.28207	5.72689	3.42762e-08	3.3614e-07	8.2392
DYNLRB2	-1.13453	6.86111	-5.72666	3.43169e-08	3.36369e-07	8.23806
LOC402116	1.03453	7.05328	5.72037	3.54369e-08	3.46413e-07	8.20702
ROPN1L	-1.26833	6.08413	-5.71553	3.63231e-08	3.53715e-07	8.18316
HAMP	1.15333	6.83332	5.70606	3.81194e-08	3.68947e-07	8.13652
DNHD3	1.37675	7.02206	5.69874	3.95691e-08	3.81526e-07	8.10045
NKG7	-1.19746	8.50349	-5.69831	3.96563e-08	3.82221e-07	8.09833
ARSE	1.16568	4.99608	5.67513	4.46158e-08	4.25188e-07	7.98449
ABP1	1.55982	5.80807	5.66095	4.79452e-08	4.53517e-07	7.91498
SELENBP1	-1.29028	8.96391	-5.65666	4.89976e-08	4.62779e-07	7.89401
MMP12	1.63688	7.04239	5.64934	5.08497e-08	4.78322e-07	7.85817
GJA1	-1.33232	8.55216	-5.6483	5.11172e-08	4.80306e-07	7.85311
HLA-DPA1	-1.00843	12.2574	-5.64041	5.31981e-08	4.97834e-07	7.81458
SRPX2	1.08754	7.63235	5.62861	5.64661e-08	5.25323e-07	7.75701
TUBB2B	1.76697	7.86909	5.62276	5.8159e-08	5.39297e-07	7.72849
CLDN11	-1.11374	6.14759	-5.61114	6.16696e-08	5.69979e-07	7.67191
PDE4D	-1.09549	6.66983	-5.6047	6.37034e-08	5.85996e-07	7.64058
YBX2	1.06145	5.57261	5.60463	6.37253e-08	5.85996e-07	7.64025
REEP6	1.1512	6.90838	5.60292	6.42757e-08	5.90844e-07	7.63195
MT2A	-1.00918	11.8565	-5.58817	6.92253e-08	6.33366e-07	7.56035
EVPL	1.09268	8.53685	5.56561	7.7519e-08	7.01673e-07	7.45114
PLEKHA6	1.01319	6.02985	5.53068	9.2309e-08	8.18643e-07	7.28267
TEKT1	-1.35895	6.01916	-5.52844	9.33467e-08	8.26782e-07	7.27189
ACP5	-1.05928	8.01841	-5.52812	9.34954e-08	8.27721e-07	7.27035
IGFBP6	-1.17084	8.35287	-5.51115	1.01747e-07	8.93614e-07	7.18878
NR2C2	1.00785	6.80911	5.5067	1.04024e-07	9.11409e-07	7.16743
KISS1R	1.29675	5.73682	5.50446	1.05185e-07	9.20319e-07	7.15672
LOC653879	-1.13618	8.54657	-5.50097	1.07028e-07	9.32781e-07	7.13998
FLJ35773	1.02615	5.37605	5.49395	1.10828e-07	9.64473e-07	7.10633
S100P	2.17135	10.0544	5.4922	1.11796e-07	9.71804e-07	7.09795
LOC284757	1.29335	6.21833	5.47446	1.22072e-07	1.05285e-06	7.01316
WDR66	1.71367	7.26326	5.46579	1.27425e-07	1.09494e-06	6.97179
COL1A2	1.03786	11.4907	5.46352	1.28866e-07	1.10582e-06	6.96095
CYR61	-1.09746	10.1154	-5.45363	1.35324e-07	1.1585e-06	6.91381
PITX1	1.90211	8.29937	5.43801	1.46166e-07	1.24171e-06	6.83953
BEX1	-1.01008	5.96498	-5.43508	1.48289e-07	1.25722e-06	6.82563
C6	-1.13178	5.58574	-5.40365	1.73082e-07	1.44906e-06	6.67666
C1QC	-1.02682	11.0406	-5.3927	1.82631e-07	1.51949e-06	6.62493
MUC16	1.67585	6.85487	5.39144	1.83764e-07	1.52693e-06	6.61897
CCL3	-1.01359	6.86361	-5.37972	1.94621e-07	1.61134e-06	6.56369
C20orf127	-1.02334	7.20661	-5.37381	2.00326e-07	1.65427e-06	6.53586
TMOD1	-1.0168	5.95184	-5.34317	2.32632e-07	1.90067e-06	6.39189
CCNA1	-1.03569	5.06606	-5.32101	2.59094e-07	2.098e-06	6.28818
PTPLA	-1.03829	7.12754	-5.31392	2.68162e-07	2.1611e-06	6.25506
PANX2	1.16552	7.01901	5.30442	2.80803e-07	2.25869e-06	6.21073
C6orf205	1.12574	5.75724	5.29405	2.95261e-07	2.36302e-06	6.16242
GOLGA8A	1.06083	6.74835	5.26872	3.33687e-07	2.64145e-06	6.04471
FLJ10916	1.06305	8.99866	5.26105	3.46246e-07	2.73066e-06	6.00917
ITGA2	1.04461	8.33023	5.25763	3.51993e-07	2.77083e-06	5.99333
TFCP2L1	1.10486	7.19244	5.25559	3.55469e-07	2.79646e-06	5.98388
LEMD1	1.24073	5.40299	5.24724	3.70045e-07	2.89768e-06	5.94523
QPRT	1.2228	8.84537	5.2241	4.13512e-07	3.20547e-06	5.83843
HLA-DPB1	-1.01453	7.87575	-5.20392	4.55436e-07	3.49529e-06	5.74558
MAP7D2	1.00634	5.06413	5.19722	4.70251e-07	3.59705e-06	5.71481
SOX9	1.34994	7.1941	5.16545	5.47084e-07	4.113e-06	5.56937
SOX15	-1.39447	6.03585	-5.16473	5.48967e-07	4.12472e-06	5.56607
VSIG2	-1.48529	7.66526	-5.15893	5.64314e-07	4.22753e-06	5.53958
PSG1	1.14111	4.68554	5.15868	5.6499e-07	4.23135e-06	5.53843
CHST9	-1.20626	5.03204	-5.15473	5.75677e-07	4.30378e-06	5.52043
CH25H	-1.3471	7.56354	-5.13834	6.22198e-07	4.61494e-06	5.44577
HP	-1.59113	6.80614	-5.12854	6.51732e-07	4.80875e-06	5.40123
TRIP13	1.05835	8.06611	5.10915	7.14235e-07	5.22444e-06	5.31329
ATOH8	-1.19356	6.48138	-5.10219	7.38057e-07	5.37703e-06	5.28178
FLJ13841	1.30276	6.77075	5.08941	7.83842e-07	5.67805e-06	5.224
MMP1	1.39642	6.17816	5.08756	7.90664e-07	5.71607e-06	5.21568
CCL18	-1.17151	6.17706	-5.07966	8.20589e-07	5.90054e-06	5.18002
SFMBT2	1.06275	6.67487	5.07439	8.41155e-07	6.03647e-06	5.15626
HOXC8	1.10741	5.67464	5.05625	9.15794e-07	6.5151e-06	5.07468
NME5	-1.02066	5.6992	-5.05015	9.42297e-07	6.70178e-06	5.0473
TMPRSS6	1.05646	4.89082	5.02945	1.03794e-06	7.30843e-06	4.95455
DMBT1	-1.06248	7.03234	-5.0125	1.12322e-06	7.82655e-06	4.87882
C4BPB	1.00402	5.35843	5.01226	1.12448e-06	7.8289e-06	4.87774
PBK	1.00928	5.93839	4.95838	1.44342e-06	9.78675e-06	4.63836
TMSL8	-1.08078	5.74714	-4.95698	1.45275e-06	9.84741e-06	4.63219
CRLF1	1.4982	6.40439	4.95233	1.48424e-06	1.00368e-05	4.61163
FLJ23834	-1.31138	5.68673	-4.94603	1.52801e-06	1.03108e-05	4.58378
HOXB7	1.15023	7.89809	4.94264	1.55206e-06	1.04537e-05	4.56882
VGF	1.11861	5.20055	4.93908	1.57772e-06	1.06011e-05	4.55311
CLDN10	1.01017	5.45519	4.933	1.62246e-06	1.08674e-05	4.52632
FOXA1	1.01556	9.90155	4.9281	1.65939e-06	1.10914e-05	4.50476
GSTA2	-1.23157	6.059	-4.92728	1.66566e-06	1.11304e-05	4.50114
VTCN1	1.58883	6.67395	4.92189	1.70743e-06	1.13886e-05	4.47742
C14orf78	1.25085	9.48717	4.90568	1.83914e-06	1.21744e-05	4.40625
HLA-DRB3	-1.11523	9.56188	-4.88685	2.00454e-06	1.3136e-05	4.32378
CA9	1.59587	6.63131	4.88584	2.01379e-06	1.31898e-05	4.31938
MGC23985	1.08253	5.14399	4.87489	2.11703e-06	1.38125e-05	4.27152
LRRC31	1.25987	6.26534	4.85755	2.29091e-06	1.4848e-05	4.19596
LOC285498	1.00631	5.67455	4.8528	2.34089e-06	1.51414e-05	4.17531
C4BPA	-1.61401	9.68293	-4.84274	2.45037e-06	1.57929e-05	4.13157
BAIAP2L2	1.24942	6.82446	4.81159	2.82134e-06	1.79653e-05	3.99671
CYP24A1	1.2845	5.36828	4.80589	2.8949e-06	1.8406e-05	3.9721
GDF15	1.16351	9.41114	4.8012	2.95678e-06	1.87432e-05	3.95187
TM4SF4	1.99004	6.08046	4.7874	3.14631e-06	1.97868e-05	3.89246
DPP4	1.05797	6.05354	4.77432	3.33684e-06	2.08681e-05	3.83626
FLNC	-1.038	7.05152	-4.70784	4.49047e-06	2.73211e-05	3.55256
GNGT1	1.02331	5.67389	4.70634	4.52067e-06	2.74851e-05	3.54616
LOC644940	1.4876	8.95379	4.70499	4.54785e-06	2.76173e-05	3.54043
NELL2	-1.01733	6.76173	-4.68304	5.01266e-06	3.01305e-05	3.44753
GPRC5A	-1.06658	7.67196	-4.67407	5.21551e-06	3.12464e-05	3.40966
C19orf4	1.16078	6.00372	4.64472	5.93609e-06	3.50839e-05	3.28617
MYEOV	1.08201	5.35487	4.63529	6.18742e-06	3.64592e-05	3.24662
ABCA4	1.20719	6.86703	4.63496	6.19649e-06	3.64957e-05	3.24522
SLC16A9	1.27343	7.11458	4.61302	6.8223e-06	3.97853e-05	3.15346
JSRP1	1.21125	7.88832	4.60175	7.16686e-06	4.16133e-05	3.10649
CLDN2	1.44185	5.75983	4.58564	7.68876e-06	4.42796e-05	3.03948
LOC649970	1.44386	7.65292	4.56077	8.56699e-06	4.88614e-05	2.93642
LOC440585	-1.29164	8.03315	-4.54212	9.28817e-06	5.24569e-05	2.85943
KIAA1199	1.13297	8.21457	4.47723	1.22808e-05	6.7441e-05	2.59358
MUC13	1.54453	5.58679	4.4541	1.35561e-05	7.37754e-05	2.49961
COL17A1	1.33164	6.53282	4.45295	1.36231e-05	7.4108e-05	2.49493
PDZK1IP1	1.1624	7.08488	4.42367	1.54296e-05	8.27144e-05	2.37655
ADAMDEC1	1.06494	6.39865	4.41052	1.63138e-05	8.69771e-05	2.3236
CXCL14	1.25115	7.67955	4.38788	1.79515e-05	9.47158e-05	2.23272
IRX2	-1.21527	7.90999	-4.29031	2.69942e-05	0.000137106	1.84562
TCN1	1.81628	6.25441	4.29021	2.70049e-05	0.000137106	1.84524
CXCL13	1.22413	7.24502	4.28399	2.77103e-05	0.000140379	1.8208
CKMT1A	1.18441	6.28058	4.26087	3.04883e-05	0.000153231	1.73026
SCGB3A1	-1.78331	10.7954	-4.21367	3.70094e-05	0.00018279	1.54671
GFRA3	1.17622	5.90884	4.19757	3.95258e-05	0.0001942	1.48446
KIF1A	1.5445	5.58169	4.18883	4.09582e-05	0.000200716	1.45078
LOC145837	1.4852	6.10079	4.18804	4.10901e-05	0.000201263	1.44773
SLC1A7	1.3199	5.60648	4.17939	4.25616e-05	0.00020783	1.41445
LOC644945	1.19409	6.12974	4.17607	4.31391e-05	0.000210327	1.4017
C10orf81	1.05287	6.36678	4.17406	4.34935e-05	0.000211857	1.39397
KRT7	1.08107	10.2842	4.15056	4.78367e-05	0.000231283	1.30397
PPP1R14C	-1.01741	7.5213	-4.14021	4.98791e-05	0.000240008	1.26446
SYT13	1.197	5.20689	4.06373	6.77653e-05	0.000315453	0.975096
LOC56901	-1.01347	8.19348	-4.05702	6.95992e-05	0.000322929	0.949907
CLIC6	1.05173	10.4979	4.00712	8.47827e-05	0.000385908	0.76387
KRTHB1	1.27911	5.52439	4.00196	8.65223e-05	0.000393053	0.744735
CT45-3	-1.26827	4.68402	-4.0002	8.71203e-05	0.000395628	0.738246
SFRP1	-1.03446	5.80561	-3.99774	8.79678e-05	0.000399049	0.729126
HPGD	-1.12256	7.87534	-3.99523	8.88396e-05	0.000402501	0.719837
GOLT1A	1.01428	7.22191	3.96224	0.000101086	0.000452027	0.598244
GRP	-1.01079	5.76916	-3.93351	0.000113046	0.000501713	0.49304
GSTA1	-1.18212	6.76245	-3.91937	0.000119412	0.000527661	0.44153
KRT16	1.25216	6.17611	3.91037	0.000123642	0.00054446	0.408806
COL7A1	1.09164	8.09274	3.89451	0.000131438	0.000574414	0.351343
S100A9	-1.02403	11.2464	-3.85819	0.000151096	0.000652365	0.220445
LOC652358	-1.21852	6.99669	-3.85102	0.000155292	0.000668777	0.194737
IGJ	-1.22545	9.14821	-3.82763	0.000169768	0.000724862	0.111122
PAEP	1.21781	5.1965	3.82472	0.000171655	0.000731441	0.100751
TMEM46	-1.09351	6.9423	-3.74963	0.000227813	0.000941851	-0.164421
GPX2	1.74053	8.24421	3.66372	0.000313257	0.00125463	-0.462131
WDR72	1.33163	6.85438	3.60835	0.000383477	0.00150444	-0.650789
KRT15	1.11753	7.46906	3.6029	0.000391139	0.00152743	-0.669224
TFF1	1.46689	5.3303	3.60013	0.00039509	0.0015412	-0.67859
PRSS3	1.08835	5.53952	3.51362	0.000539061	0.00203748	-0.967689
MUC5AC	1.35322	6.34898	3.49406	0.00057782	0.00216947	-1.03218
MS4A8B	-1.02942	5.81249	-3.40399	0.000792456	0.00288163	-1.32501
FGB	1.00221	5.33668	3.36322	0.000912338	0.00326674	-1.4553
PROM1	1.21367	8.17306	3.16805	0.00175843	0.00588909	-2.05941
CLCA2	-1.00688	5.27699	-3.08931	0.00227172	0.00740236	-2.29383
ANXA10	1.05393	5.17536	2.91219	0.00396852	0.0121629	-2.80136
MSLN	-1.19929	9.99461	-2.86436	0.00459365	0.0138749	-2.93367
AKR1B10	1.30108	6.54737	2.76158	0.00625106	0.0182752	-3.21115
PLUNC	1.11672	6.16883	2.74753	0.00651558	0.0189482	-3.24834
LGALS4	1.00573	5.59757	2.69971	0.00749345	0.0214511	-3.37361
KRT6A	1.01619	6.46816	2.63218	0.00910047	0.0255002	-3.54701
KRT17	1.04197	9.18284	2.6073	0.00976655	0.0271615	-3.60986
KRT5	-1.05856	5.51818	-2.38784	0.0178152	0.0459681	-4.1399
